# Supplementary material
Source: PubMed Central journal article supplement (PMC4169960)
Supplement: pnas.1322761111.sapp.pdf [file pnas.1322761111.sapp.pdf]

**Supporting Information Corrected October 27, 2014**

**Figure Legends, Supplemental Computational/Experimental Procedures/Analysis**

**Utilization of extracellular information before ligand-receptor binding reaches equilibrium expands and shifts the input dynamic range.**

Alejandra C Ventura, Alan Bush, Gustavo Vasen, Matías A Goldín, Brianne Burkinshaw, Nirveek Bhattacharjee, Albert Folch, Roger Brent, Ariel Chernomoretz, and Alejandro Colman-Lerner

**Table of contents.**

|                                                                                                                                        |    |
|----------------------------------------------------------------------------------------------------------------------------------------|----|
| Supplemental Figures directly called from the main text.....                                                                           | 3  |
| Figure S1. Toy models with transient signaling modules perform PRESS, related to Figure 2.....                                         | 3  |
| Figure S2. The effect of noise during PRESS, related to Figure 2. ....                                                                 | 4  |
| Figure S3. Characterization of PRESS applied to gradient detection, related to Figure 3. ....                                          | 5  |
| Figure S4. Timing of yeast polarization, related to Figure 3.....                                                                      | 6  |
| Figure S5. Timing of polarization patch relocalization, related to Figure 3.....                                                       | 7  |
| Figure S6. The $\alpha F$ receptor binding dynamics might be optimal for PRESS, related to Figure 4.....                               | 8  |
| 1. Characterization of the ligand-receptor time-dependent dose-response curve. ....                                                    | 9  |
| 2. Toy models with transient signaling modules perform PRESS.....                                                                      | 11 |
| Model 1: X with an inactive refractory state.....                                                                                      | 11 |
| Model 2: X controlled by an incoherent feed-forward loop (IFFL); and Model 3: X controlled by a negative feed-back loop (NFBL). ....   | 11 |
| 3. Models with transient signaling may be subsensitive, helping to expand the input dynamic range. .                                   | 13 |
| Sensitivity in Model 1: X with an inactive refractory state. ....                                                                      | 13 |
| Table S1. Model 1 sensitivity. ....                                                                                                    | 14 |
| Sensitivity in Model 3: X controlled by a negative feed-back loop (NFBL). ....                                                         | 15 |
| Table S2. Model 3 sensitivity. ....                                                                                                    | 15 |
| General conclusions based on the above studies and the results in the main text:.....                                                  | 15 |
| 4. The effect of noise during PRESS .....                                                                                              | 18 |
| 5. Mathematical model to study the sensing of a stationary spatial gradient .....                                                      | 20 |
| 5.1 An analytical expression for the $\alpha F$ gradient generated by a point source, and for the variable Delta (Description 1) ..... | 20 |
| 5.1.1 A simplified formula for the $\alpha F$ gradient generated by a point source, and the variable Delta                             | 23 |
| 5.2 An analytical expression for the variable Delta (Description 2) .....                                                              | 25 |
| Table S3. Strains. ....                                                                                                                | 28 |
| 6 Supplemental experimental procedures .....                                                                                           | 28 |
| 6.1 Strains and plasmids. ....                                                                                                         | 28 |
| 6.2 Quantification of Polarization Times.....                                                                                          | 29 |
| 7. Triple monomeric NeonGreen DNA sequence.....                                                                                        | 30 |
| 8. Supplemental References .....                                                                                                       | 31 |

**Supplemental Figures directly called from the main text.**

**Figure S1. Toy models with transient signaling modules perform PRESS, related to Figure 2.**

In the three models, left panels contain schemas of the corresponding model, middle panels show dose-responses and right panels show temporal dynamics. Parameters were selected so that  $X^*$  has a transient behavior. Dose-responses are included for the equilibrium value of C (ligand-receptor complex) in solid black lines, and for the maximum of  $X^*$  in dashed blue lines. The dose of the ligand is normalized by the  $K_d$  of the binding/unbinding reaction. Temporal profiles of C (solid lines) and of  $X^*$  (dashed lines) are included at ligand concentrations indicated over the traces.

**A. X with an inactive refractory state** (same as in Figure 2). **Left.** Occupied receptor activates effector X; after a while, active X ( $X^*$ ) converts into an inactive refractory state ( $X^\wedge$ ), which slowly converts back to the inactive form (X), closing the cycle. **Middle.** Parameter values:  $k_+ = 0.001$  1/sec,  $r_1 = 0.1$ ,  $r_2 = 0.06-0.8-1.6$  (increasing from left to right in the middle panel),  $r_3 = 0.001$ ,  $X_{tot} = 10$  ( $k_+$  is not needed because of the dimensionless variables chosen, see section 1). EC50 for each response: 1 for C, and for  $X^*$  is 9.3 for  $r_2 = 0.06$ , 65.8 for  $r_2 = 0.8$ , and 87 for  $r_2 = 1.6$ . **Right.** Temporal profiles for the same parameters as in the middle panel, using  $r_2 = 0.8$ .

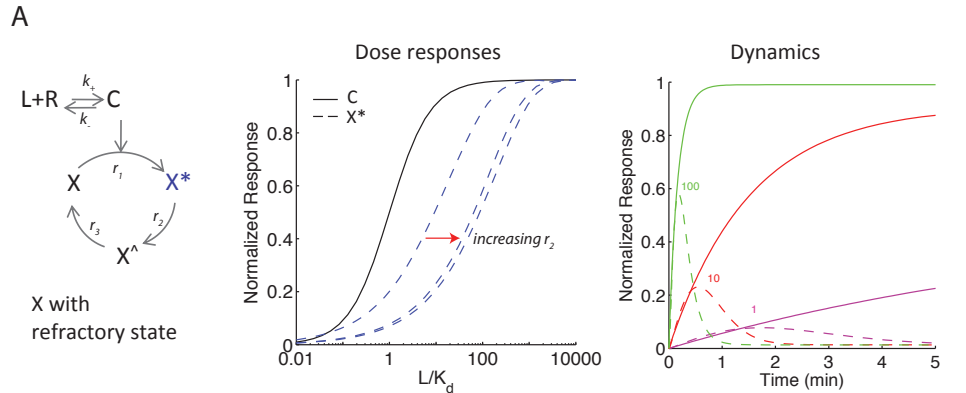

**B. X controlled by an incoherent feed-forward loop (IFFL).** **Left.** Occupied receptor activates both B and X into  $B^*$  and  $X^*$ , and  $B^*$  increases  $X^*$  inactivation. **Middle.** Parameter values:  $k = 0.001-0.1$  1/sec (from right to left),  $k_{CB} = 0.5$ ,  $K_{CB} = 0.01$ ,  $k_{FBB} = 10$ ,  $K_{FBB} = 10$ ,  $F_B = 0.5$ ,  $k_{CX} = 2$ ,  $K_{CX} = 0.1$ ,  $k_{BX} = 3$ ,  $K_{BX} = 0.1$  (see SI Appendix, Section 2 for details of the model,  $k_i$  are catalytic rate constants and  $K_i$  are Michaelis-Menten constants, for example,  $k_{CB}$  and  $K_{CB}$  are the pair characterizing how C regulates B). **Right.** Temporal profiles for the same parameters as in the middle panel, using  $k = 0.001$  1/sec.

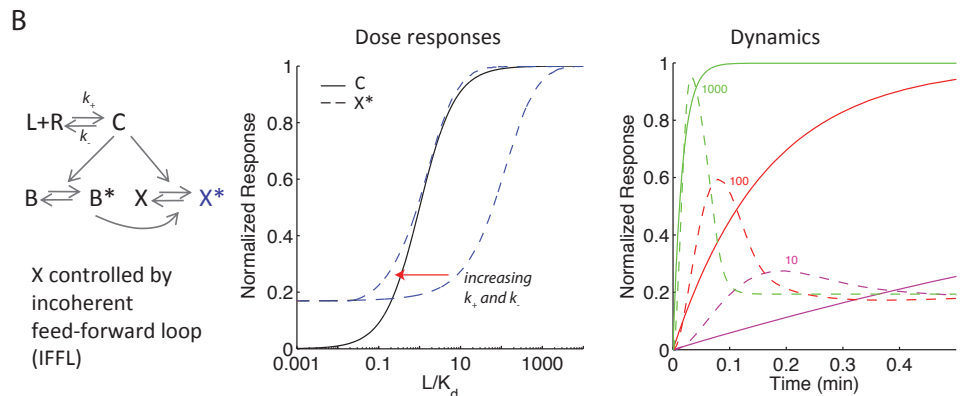

**C. X controlled by a negative feed-back loop (NFBL).** **Left.** Occupied receptor activates X into  $X^*$ ,  $X^*$  activates B into  $B^*$ , and  $B^*$  increases  $X^*$  inactivation. **Middle.** Parameter values:  $k = 0.001-0.1$  1/sec (from right to left),  $k_{XB} = 1$ ,  $K_{XB} = 0.01$ ,  $k_{FBB} = 5$ ,  $K_{FBB} = 100$ ,  $F_B = 0.5$ ,  $k_{CX} = 5$ ,  $K_{CX} = 0.1$ ,  $k_{BX} = 6$ ,  $K_{BX} = 0.01$  (see SI Appendix, Section 2 for details of the model). **Right.** Temporal profiles for the same parameters as in the middle panel, using  $k = 0.001$  1/sec.

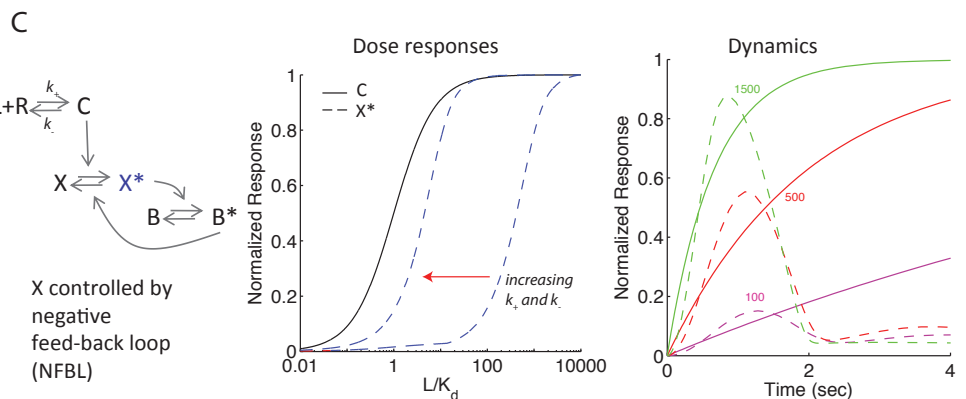

**Figure S2. The effect of noise during PRESS, related to Figure 2.**

Results of simulating Model 1 (the model with an inactive refractory state) for low, medium, and high number of receptors (30-300-3000), using stochastic methods. Simulations were done in Copasi using its adaptive tau-leaping algorithm. Parameter values:  $k_1=0.0002$  ml/(pmol\*sec),  $k_2=0.001$  1/s,  $r_1=0.01$  ml/(pmol\*sec),  $r_2=0.06$  1/sec,  $r_3=0.001$  1/sec (with 1 pmol/ml = 1 nM). Initial particle numbers: receptor=30-300-3000,  $x=14536.5$ . Cell volume=  $5e-11$  ml. Left panels (A, C and E) contain normalized dose-response curves and right panels (B, D and F) contain normalized temporal profiles, A and B correspond to 3000, C and D to 300 and E and F to 30 receptors per cell, as indicated over the figure. **Left panels:** Equilibrium value of the ligand-receptor complex  $C$  ( $C_{ss}$ ) in red dashed lines, maximum of  $X^*$  ( $X^*_{max}$ ) in black dashed lines, and  $C$  at the time where  $X^*$  reaches its maximum ( $C(t_{max})$ ) in blue dashed lines. The dose of the ligand is normalized by the  $K_d$  of the binding/unbinding reaction. Open circles and error bars correspond to mean value and standard deviation over  $N=1001$  stochastic simulations performed with the same set of parameter values for each value of ligand, 9 values of ligand were considered in the range 0.05-500 nM (corresponding to 0.01-100  $L/K_d$ ). **Right panels:**  $L/K_d=1-10-100$   $K_d$  are indicated in green, red, black, respectively. Monotonic curves correspond to the ligand-receptor complex  $C$ , curves with transient behavior correspond to  $X^*$ . Both in left and right panels curves were normalized as follows:  $C_{eq}$  and  $C(t_{max})$  were divided by the initial receptor particle number and  $X^*$  was divided by the initial  $X$  particle number. **G:**  $CV^2$  (coefficient of variation, the ratio of the standard deviation to the mean, squared) versus normalized ligand, for 3000-300-30 receptors per cell (dotted, dashed, solid lines, respectively).  $CV^2$  for  $C(t_{max})$  in blue, and for  $X^*_{max}$  in black.

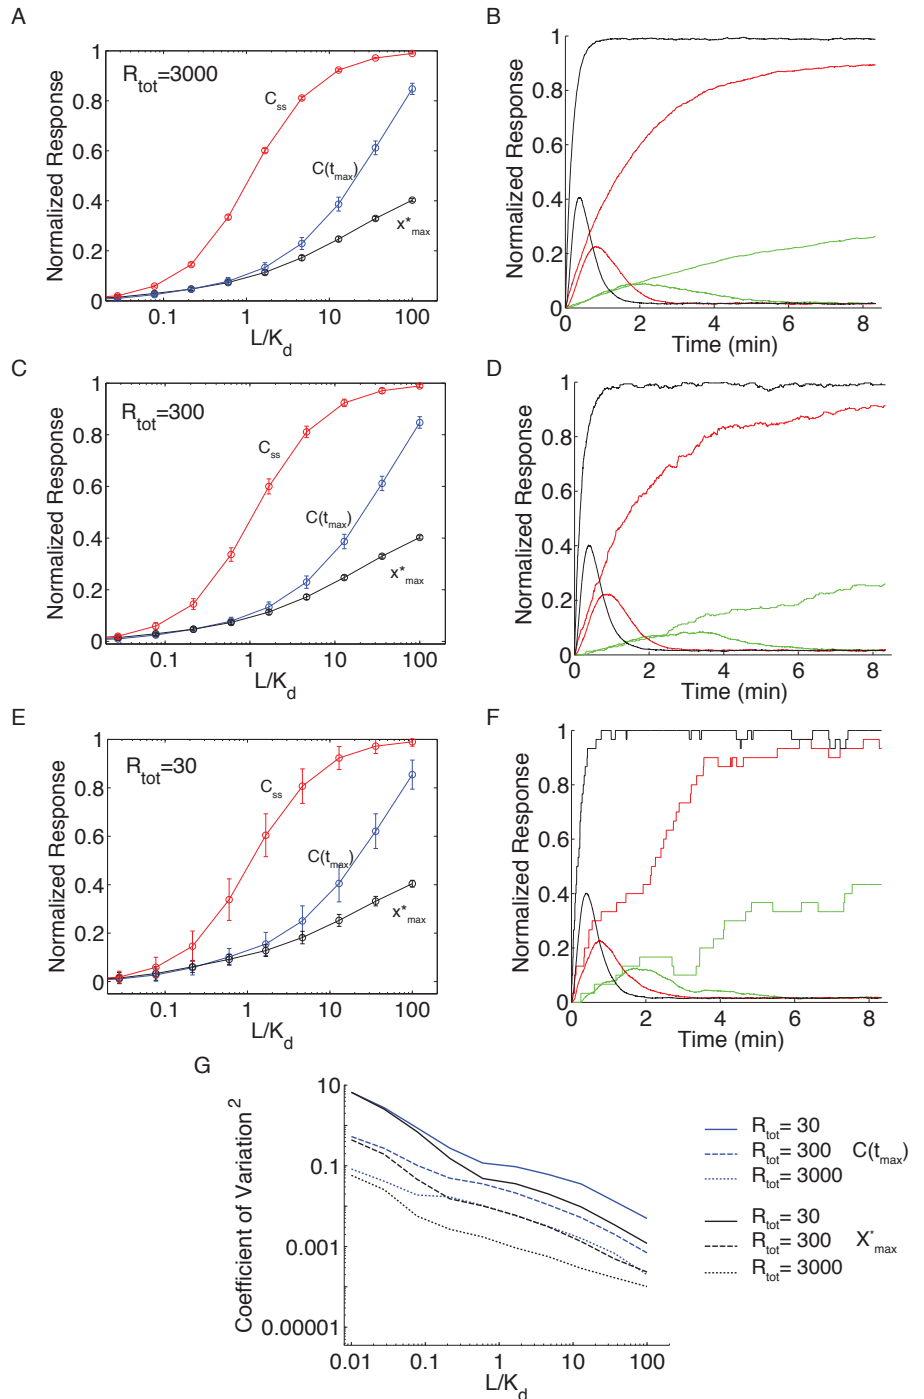

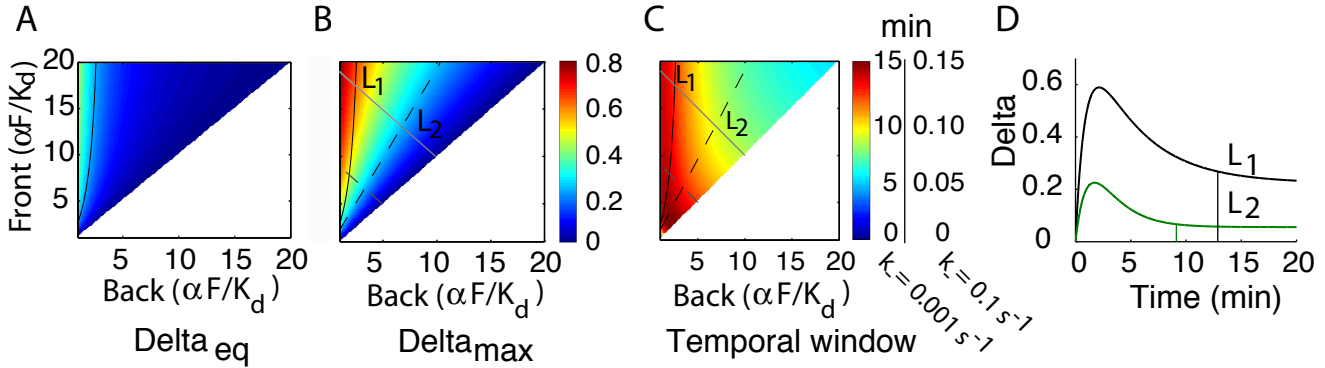

**Figure S3. Characterization of PRESS applied to gradient detection, related to Figure 3.**

**A-C.** Graphs are heatmaps of  $\Delta_{\text{eq}}$  (A),  $\Delta_{\text{max}}$  (B) and temporal window (C) as functions of  $\widehat{\alpha F}_f$  and  $\widehat{\alpha F}_b$  ( $\alpha F_f$  and  $\alpha F_b$  divided by the  $K_d$ ). Since we are considering gradients,  $\alpha F_f$  has to be greater than  $\alpha F_b$  (and this is why the figure is blank below the diagonal).  $\Delta_{\text{eq}}$  and  $\Delta_{\text{max}}$  were calculated using the analytical calculation in the SI Appendix, and are plotted using the same color scale. The temporal window was numerically calculated as the interval during which  $\Delta$  is more than 1.2  $\Delta_{\text{eq}}$ . We show two color scales, obtained with the indicated unbinding rates  $k$ . The black solid line over each panels corresponds to  $\Delta_{\text{eq}} = 0.23$  and the black dashed line corresponds to  $\Delta_{\text{max}} = 0.23$ . The solid grey line represents a gradient with an average between front and back of 10  $K_d$  and the dashed grey line, 5  $K_d$ . A cell sensing with an average 10  $K_d$  could have different combinations of  $\widehat{\alpha F}_b$  and  $\widehat{\alpha F}_f$ , some of them will result in  $\Delta_{\text{max}} > 0.23$  and  $\Delta_{\text{eq}} < 0.23$  (those that correspond to the grey solid line in the region between the solid and dashed black lines). The intersections of the line representing an average of 10  $K_d$  and the lines for  $\Delta_{\text{eq}} = 0.23$  and  $\Delta_{\text{max}} = 0.23$  are identified as  $L_1$  and  $L_2$ , respectively.  $L_1$  is characterized by  $\widehat{\alpha F}_f = 17.4$  and  $\widehat{\alpha F}_b = 2.6$ , resulting in  $\Delta_{\text{eq}} = 0.23$  and  $\Delta_{\text{max}} = 0.59$ , respectively, and a temporal window of 12.9 min.  $L_2$  is characterized by  $\widehat{\alpha F}_f = 13.1$  and  $\widehat{\alpha F}_b = 6.9$ , respectively, resulting in  $\Delta_{\text{eq}} = 0.06$  and  $\Delta_{\text{max}} = 0.23$  and a temporal window of 9.1 min. **D.**  $\Delta(t)$  vs time, for  $L_1$  and  $L_2$ . The vertical line indicates the time were the temporal window for PRESS ends.

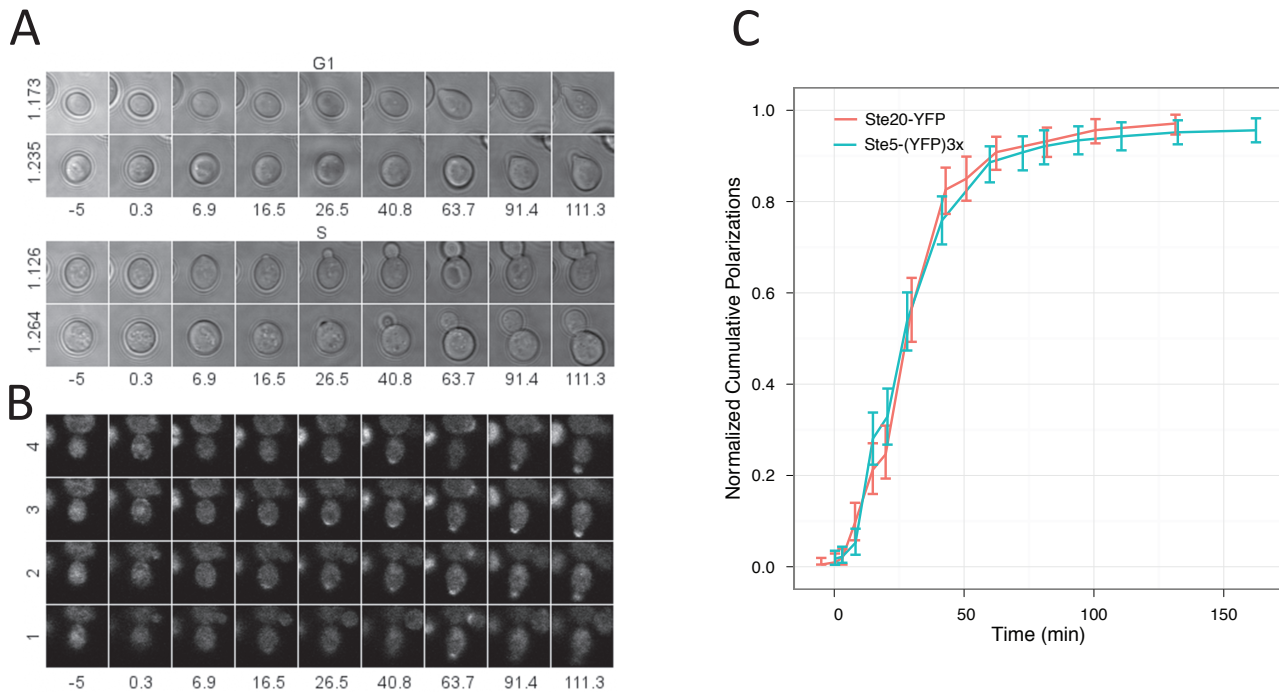

**Figure S4. Timing of yeast polarization, related to Figure 3.**

**A.** Example of a transmission image montage used to determine the position in the cell cycle (YPP3662 strain,  $1\mu\text{M}$   $\alpha$ -factor). G1 cells (top) respond to pheromone forming a mating projection. S cells (bottom) first bud and then respond to pheromone. Time in minutes is shown below each image, and the ID of each cell is shown on the left.

**B.** Example of a YFP image montage used to determine the polarization time (YPP3662 strain,  $1\mu\text{M}$   $\alpha$ -factor). The slice number of the Z stack is indicated on the left. Time in minutes is shown below each image.

**C.** Cumulative fraction of polarized cells vs. time for Ste5-YFPx3 (YPP3662) or Ste20-YFP (ESY3136). Cells were stimulated with  $1\mu\text{M}$   $\alpha$ -factor at time zero. Only cells in G1 were considered for this analysis. Error bars represent the 95% confidence interval of the mean as calculated by bootstrap.

**Figure S5. Timing of polarization patch relocation, related to Figure 3.**

**A.** The microfluidic device we used. It contains two ports, one filled with a red dye (labeled input source 1) and the other one with a blue dye (labeled input source 2), and 4 open chambers (200 x 500 μm). Two of the chambers receive different inputs, and a gradient is formed; the other two serve as controls. The fluid is delivered to the wells by a binary splitting manifold that ends in a line of 38 microjets of 10 μm wide and 2.5 μm tall.

**B.** The dynamics of gradient formation. We formed a gradient using a solution of BPB (bromophenol blue, 0.01%) as source 1 and water as source 2. We determined the gradient profile measuring BPB fluorescence using a standard Texas Red filter cube. At t=0, we washed away the chamber with a pipet and then we monitored gradient formation by imaging every 15 seconds. The gradient is linear and it reaches the steady state in ~3 min.

**C.** Brightfield image of yeast strain ACL379 exposed to a gradient of 0-50nM of αF for 3 hours. The middle region of the chamber displays the highest percentage of cells oriented in the direction of the gradient.

**D.** Histogram showing the quantification of the angles between the shmoo and the direction of the gradient. Perfectly aligned cells display an angle of 0°. The isotropic chamber (right) has no bias in the angle, as expected for random polarization (uniform external cue).

**E.** Diagram representing the measurement of patch repositioning time. Newly divided cells show Bem1 polarization at the bud-neck. In response to α factor exposure, Bem1 forms a new patch somewhere in the cell periphery. Depending on the position of the new polarization, patches (both in mothers or daughters) were classified as “proximal”, “distal” or “no internal cue”. The time (in minutes) between the last frame with bud-neck polarization and the first with a new visible patch was used to estimate the repositioning time. We show an example of each group of yeast YGV5097 (expressing Bem1-mNG<sub>(3x)</sub>) (blue arrowheads indicate the polarization in the neck, yellow arrowheads show a new patch and the repositioning time is delineated by the red line). Average repositioning time is presented in the table (mean ± standard deviation).

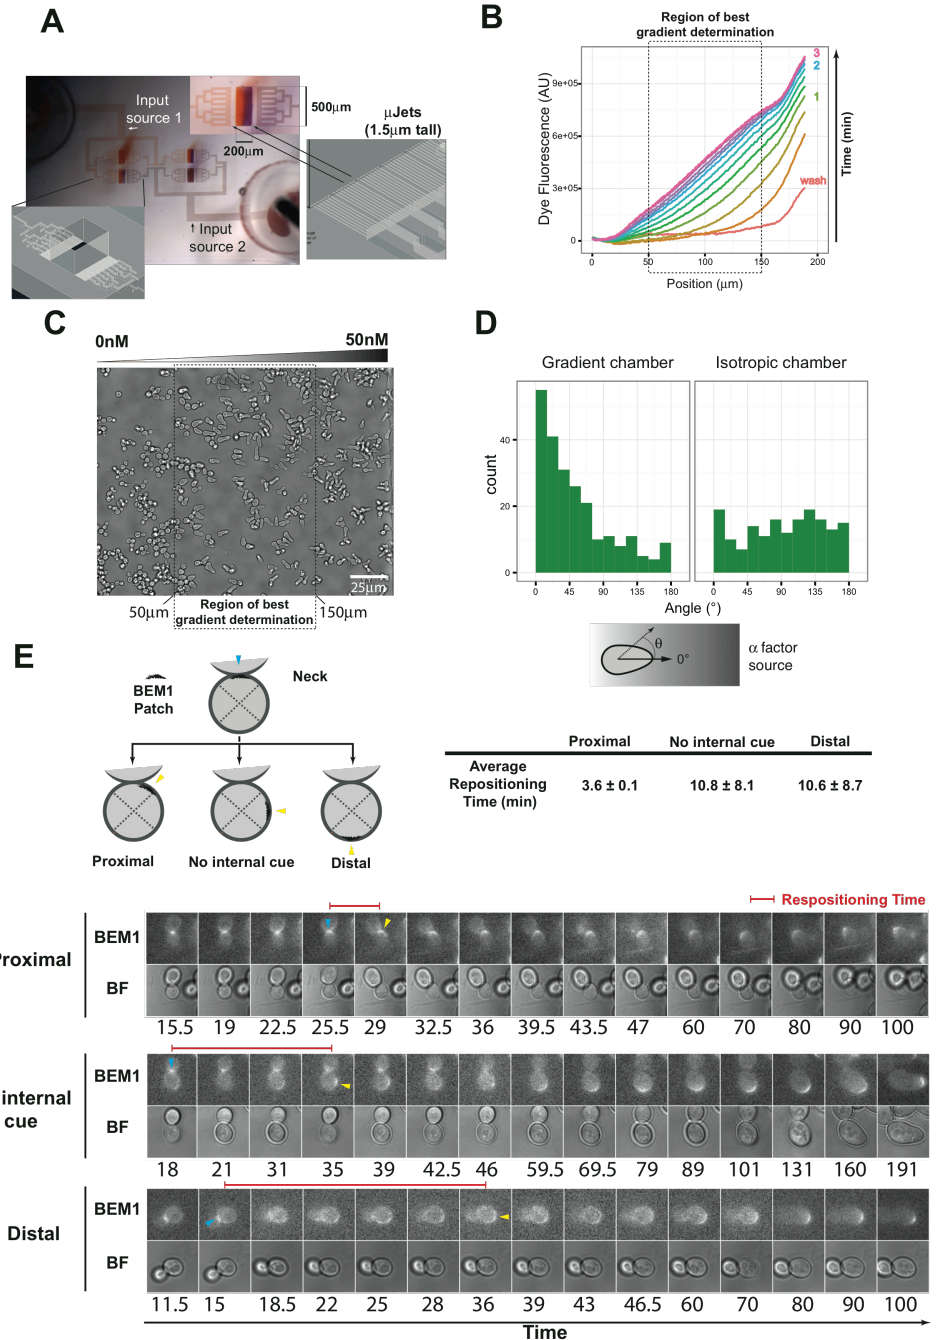

**Figure S6. The  $\alpha$ F receptor binding dynamics might be optimal for PRESS, related to Figure 4.**

**A.** Percentage of polarizations in the front quadrant as a function of

binding dynamics (parameter  $k$ -), using  $\frac{q}{4\pi Dd} = 10$  and  $\frac{a}{d} = 0.3$

(corresponding to  $p_1=10$  and  $p_2=0.3$ , see SI Appendix, Section 5), as in Fig. 4D. For each value of  $k$ , we run a set of stochastic numerical simulations (Altschuler's model with external gradient as input), and counted the number of runs that resulted in a polarized state, and then determined how many polarized in the quadrant facing the  $\alpha$ F source (front quadrant). We computed polarizations that took place in the first five minutes of the simulation as in Fig 4D (black circles) or in the total simulation time of fifteen minutes (red circles). We varied parameter  $k$  from 0.0001 1/sec to 0.1 1/sec (this last value corresponding to the "fast" receptor in Fig. 4D). A horizontal line over the plot indicates the expected percentage output if polarizations were randomly located, *i.e.* 25%. For fast receptor dynamics, the system is unable to use the gradient information. A receptor slower than wt results in improved sensing, but only allowing more time to polarize. When evaluating the polarization performance in 5 min (black circles) we found a maximum in the percentage outputs in the front quadrant at  $k$  of about 0.0003 1/sec. For the time window of 15 min instead, the maximum is achieved at the slower dynamics considered for this figure ( $k=0.0001$  1/sec).

**B.** Percentage of polarizing cells as a function of parameter

$\frac{q}{4\pi Dd} = 10$  and  $\frac{a}{d} = 0.3$  (corresponding to  $p_1=10$  and  $p_2=0.3$ , see SI

Appendix, Section 5). As explained in (A), if the receptor dynamics is very slow, very few cells polarize in 5 min.

Combining the information in (A) and (B), we conclude that there is a tradeoff between achieving a good number of polarizing cells in a population and obtaining a good performance for those polarizations (in the sense that those cells correctly identify the position of the partner). If the decision has to be made in the first 5 minutes, then the dynamics corresponding to the  $\alpha$ -factor receptor ( $k=0.001$  1/sec) results in the best combination of polarizing cells with successful polarizations. For a longer time interval, like the one of 15 minutes analyzed, the optimal occurs for a still slower dynamics,  $k$  about 0.0003 1/sec.

**C.** Summation of all the polarizations that appeared for a time less or equal than the time indicated in the horizontal axis, normalized by the total number of polarizations achieved at the end of the simulation ( $t=15$  min). Each value of  $k$  is indicated with a different color as shown in the figure.

The number of stochastic numerical simulations performed for each value of  $k$  is: 19,000 for  $k=0.0001$  1/sec, 10280 for  $k=0.0003$  1/sec, and 2000 for all the other values of  $k$ .

Comparing the outputs for each two successive values of  $k$  indicate that only the following pairs are significantly different ( $p < 0.05$ ): 0.0003-0.001, and 0.001-0.004 at 5 min; 0.0001-0.0003, and 0.001-0.004 at 15 min.

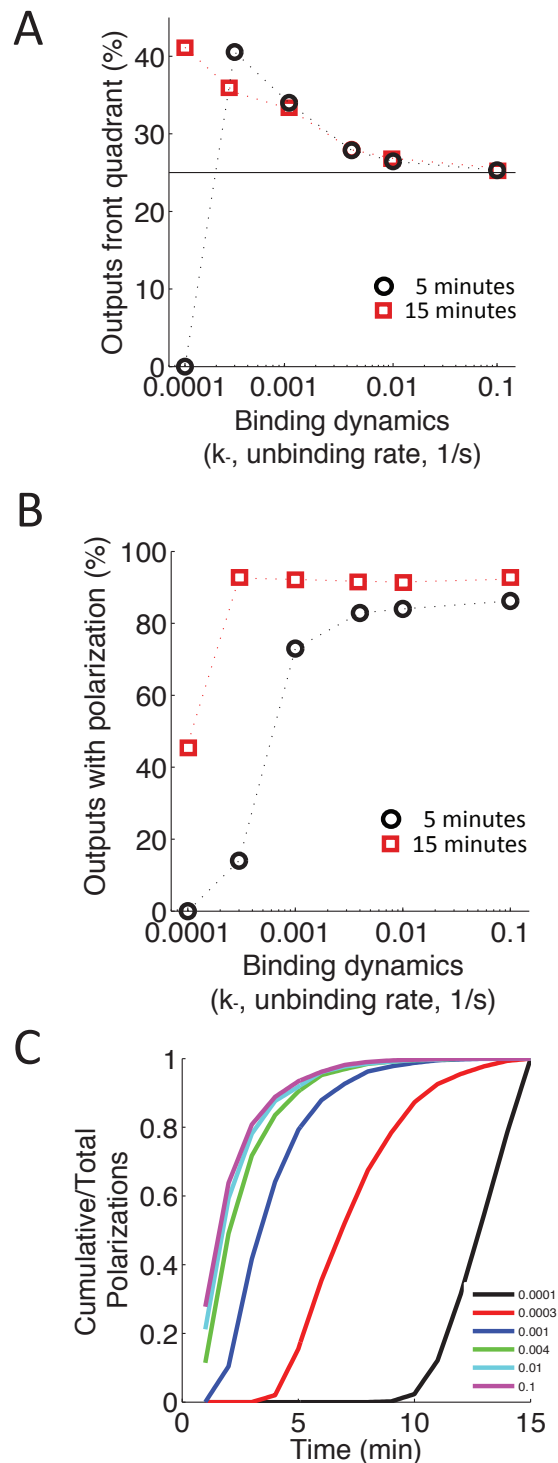



### 1. Characterization of the ligand-receptor time-dependent dose-response curve.

In this section we characterize the sensitivity and potency (given by parameters  $n_H$  and  $EC_{50}$ , respectively) of the curve that describes the time evolution of occupied receptor at different doses of ligand for the simple case of one-step binding, assuming that free L is not significantly affected by the reaction:

$$C_{(t,L)} = C_{eq(L)} * (1 - e^{(-t/\tau(L))})$$

with

$$C_{eq} = R_{tot} \frac{L}{L+K_d} = R_{tot} \frac{L/K_d}{L/K_d+1}$$

the steady-state value for C and

$$\tau = \frac{1}{k_- + L * k_+} = \frac{1}{k_- (1 + \frac{L}{K_d})}$$

the characteristic time  $\tau$  (time required to reach 63.2% of the steady-state value). L is the ligand, R is the receptor, C is the complex ligand-receptor, and  $k_+$  and  $k_-$  are the binding and unbinding rates, respectively. Normalizing the curve  $C(t,L)$  by  $R_{tot}$  and defining  $x=L/K_d$  (normalized ligand concentration), results in a function that depends only on  $x$  and  $k_-$ :

$$C_{(t,x)} = \frac{x}{1+x} * (1 - e^{(-t * k_- * (1+x))})$$

The steady-state of this last function, which we obtained by taking the limit  $t \rightarrow \infty$ , has an  $n_H = 1$  and  $EC_{50} = 1$ . We are interested in obtaining the  $EC_{50}$  and  $n_H$  for normalized C versus  $x$ , for any given time, which will result in two relationships:  $EC_{50}(t)$  and  $n_H(t)$ . Instead of  $EC_{50}(t)$  we could easily obtain the inverse function,  $t(EC_{50})$ , as follows:

$$t = \frac{1}{k_- * (1 + EC_{50})} \log \left( \frac{2 * EC_{50}}{EC_{50} - 1} \right)$$

Based on this last expression, we plot  $EC_{50}$  versus time in Fig. S7. According to this plot,

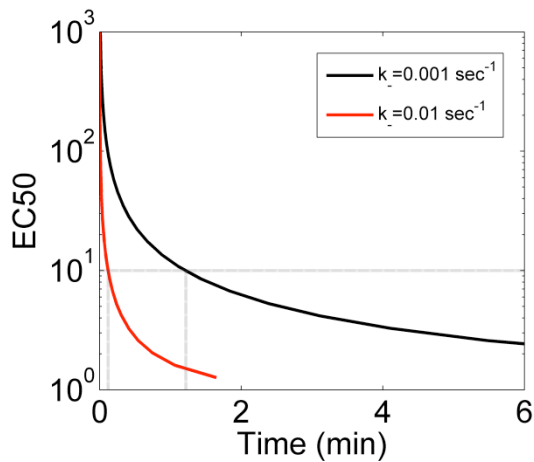

**Figure S7.  $EC_{50}$  of L-receptor binding curve vs. Time.**  $EC_{50}$  is in units of  $L/K_d$ .

1.  $EC_{50} > 1$  for every time, and  $EC_{50} = 1$  only for the equilibrium binding curve;
2.  $EC_{50}$  decreases when time increases;
3. If  $k_-$  is large (fast unbinding reaction), the time at which the curve C versus  $x$  has a given  $EC_{50}$  is small. For example, if the desired  $EC_{50}$  is  $10 * K_d$ , then, the dose response curve has that  $EC_{50}$  at around  $\sim 1$  min for  $k_- = 0.001 \text{ sec}^{-1}$  and at  $\sim 0.1$  min for  $k_- = 0.01 \text{ sec}^{-1}$ , see Fig. S7.

Regarding the sensitivity of the normalized C versus  $x$  curve for times prior to reaching the equilibrium, we obtained an approximated  $n_H = 1.4$  in the limit of low values of  $t * k_-$ . We

obtained this value by deriving  $t(EC_{90})$  and  $t(EC_{10})$  in the same way we derived  $t(EC_{50})$ , and neglecting terms as follows:

$$t = \frac{-1}{k_- * (1 + EC_{10})} \log\left(\frac{EC_{10} * 0.9 - 0.1}{EC_{10}}\right) \sim \frac{-1}{k_- * (1 + EC_{10})} \log(0.9)$$

$$t = \frac{-1}{k_- * (1 + EC_{90})} \log\left(\frac{EC_{90} * 0.1 - 0.9}{EC_{90}}\right) \sim \frac{-1}{k_- * (1 + EC_{90})} \log(0.1)$$

These approximations are valid because at short times ( $t*k \ll 1$ ), both  $EC_{90}$  and  $EC_{10}$  are much greater than one, similar to the behavior of  $EC_{50}$  (Figure S7). From the last two formulas we obtained the ratio  $EC_{90}/EC_{10}$ :

$$\frac{EC_{90}}{EC_{10}} = \frac{-\log(0.1) - t*k_-}{-\log(0.9) - t*k_-}$$

which results in 21.85 when  $t*k$  is neglected, leading to  $n_H = 1.42$  ( $n_H = \log(81)/\log(EC_{90}/EC_{10})$ ). This approximated result indicates that the sensitivity goes from about 1.4, in the limit of low values of  $t*k$ , to 1, in the limit of  $t \rightarrow \infty$ , and means that before reaching equilibrium the sensitivity is higher than when it is reached.

## 2. Toy models with transient signaling modules perform PRESS

### Model 1: X with an inactive refractory state.

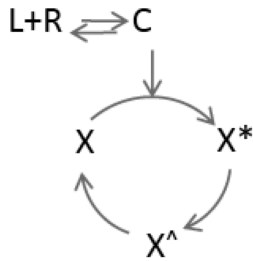

**Figure S8. Toy model with a refractory state.**

Toy model of a downstream response activated by the ligand-receptor complex. Occupied receptor activates effector X; after a while, active X ( $X^*$ ) converts into an inactive refractory state ( $X^A$ ), which slowly converts back to the inactive form (X), closing the cycle.

Occupied receptor activates effector X with a rate  $r_1$ ; active X ( $X^*$ ) converts into an inactive refractory state ( $X^A$ ) with rate  $r_2$ , which converts back to the inactive form (X) with rate  $r_3$ , closing the cycle (see Fig. S8). Assuming that the total amount of X,  $X_{\text{tot}} = X + X^* + X^A$  is conserved, the system is described by the following ordinary differential equations:

$$\frac{dX}{dt} = -r_1XC + r_3(X_{\text{tot}} - X^* - X) \quad (1)$$

$$\frac{dX^*}{dt} = r_1XC - r_2X^* \quad (2)$$

where C is the ligand-receptor complex. The parameters used in the numerical simulations reported in Figs. 2a-b in the main text are  $r_1 = 0.1$ ,  $r_2 = 0.8$ ,  $r_3 = 0.001$ ,  $X_{\text{tot}} = 10$ , and the initial condition was such that all the effector was initially in its inactive state X. The steady-state reached by this systems is characterized by  $X_{\text{eq}}^*/X_{\text{tot}} = r_3/(r_3 + r_2 + r_2r_3/(r_1C_{\text{eq}}))$  and  $X_{\text{eq}}/X_{\text{tot}} = r_2r_3/(r_2r_3 + r_1C_{\text{eq}}(r_2 + r_3))$ .

### Model 2: X controlled by an incoherent feed-forward loop (IFFL); and Model 3: X controlled by a negative feed-back loop (NFBL).

The equations for the network depicted in Fig. S9 and Fig. S10 were adapted from those in Ma et al (1)

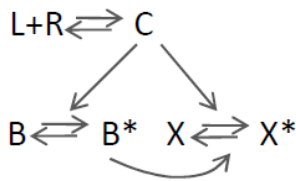

**Figure S9. Toy model of an incoherent feedforward loop.**

Occupied receptor activates both B and X, into  $B^*$  and  $X^*$ , respectively.  $B^*$  regulates the inactivation of  $X^*$  into X.

for the case where one node is a ligand-receptor complex. We assume that each node (C, B, X) has a fixed concentration (normalized to 1) but has two forms: C is the ligand-receptor complex and  $(1-C)$  is the free receptor;  $B^*$  and  $X^*$  represent the concentration of active states,  $(1-B^*)$  and  $(1-X^*)$  are the concentration of the inactive states. L is the concentration of free ligand and  $k_+$  and  $k_-$  are the binding and unbinding rates, respectively.  $k_{CB}$  and  $k_{CX}$  are the strength with which C activates B and X into  $B^*$  and  $X^*$ , and  $k_{BX}$  is the strength of the negative regulation from  $B^*$  to  $X^*$ . If a node has only positive incoming links, like node B in Fig. S9 and in Fig. S10, it is assumed that there is a background (constitutive) deactivating enzyme  $F_i$  of a constant concentration to catalyze the reverse reaction (see Ma et al (1) for details). The resulting equations

describing the network in Fig. S9 are:

$$\begin{aligned}\frac{dC}{dt} &= k_+ \cdot L(1 - C) - k_- C \\ \frac{dB^*}{dt} &= k_{CB} \cdot C \frac{(1 - B^*)}{(1 - B^*) + K_{CB}} - k_{FBB} \cdot F_B \frac{B^*}{B^* + K_{FBB}} \\ \frac{dX^*}{dt} &= k_{CX} \cdot C^* \frac{(1 - X^*)}{(1 - X^*) + K_{CX}} - k_{BX} \cdot B^* \frac{X^*}{X^* + K_{BX}}\end{aligned}$$

The resulting equations describing the network in Fig. S10 are:

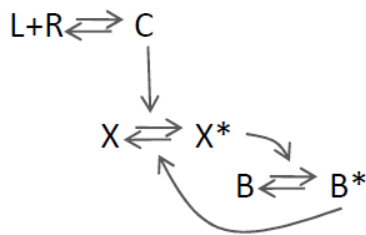

$$\begin{aligned}\frac{dC}{dt} &= k_+ \cdot L(1 - C) - k_- C \\ \frac{dB^*}{dt} &= k_{XB} \cdot X^* \frac{(1 - B^*)}{(1 - B^*) + K_{XB}} - k_{FBB} \cdot F_B \frac{B^*}{B^* + K_{FBB}} \\ \frac{dX^*}{dt} &= k_{CX} \cdot C \frac{(1 - X^*)}{(1 - X^*) + K_{CX}} - k_{BX} \cdot B^* \frac{X^*}{X^* + K_{BX}}\end{aligned}$$

**Figure S10. Toy model of a negative feedback loop.**

Occupied receptor activates X into X\*, X\* activates B into B\* and B\* regulates the inactivation of X\* into X.

### **3. Models with transient signaling may be subsensitive, helping to expand the input dynamic range.**

**Modulation** of the input dynamic range could imply its **expansion/compression** (i.e., an increase or decrease of the range of doses where the system produces dose-dependent responses), its **displacement** (i.e., the ratio  $EC_{90}/EC_{10}$  is the same but it is centered around a different dose), or a combination of both. Expansion/compression of the dynamic range is determined by the sensitivity of the response, quantified by the change in the Hill coefficient  $n_H$  ( $\log(81)/\log(EC_{90}/EC_{10})$ ) of the response: the higher the  $n_H$ , the smaller the input dynamic range. Displacement of the dynamic range is usually quantified by the change in the  $EC_{50}$  of the response. A rightward displacement of the  $EC_{50}$  with constant  $n_H$  enables dose-dependent responses in the high concentration range without compromising sensitivity, while a decrease in  $n_H$  with constant  $EC_{50}$  results in an extended range of dose-dependent responses and a corresponding loss of sensitivity, meaning that the difference in the output you get for two different stimuli is smaller than otherwise would have been.

The common Michaelis-Menten relationship gives, by definition, an  $n_H=1$ . Subsensitive responses (i.e.,  $n_H < 1$ ) may arise, for example, from the presence of negative cooperativity (2) or negative feedback (3). Systems with transient responses, such as the one we implemented in our three toy models, also known as pulse-generators, can be subsensitive. Given that one of the effects of the PRESS signaling mode is to make the overall response subsensitive (expand the input dynamic range), we asked if the transient responses we implemented are intrinsically subsensitive (i.e., when studied uncoupled from a binding mechanism); and if so, how this subsensitivity contributes to the overall system behavior, when coupled to a slow or a fast binding reaction. With this in mind, in what follows we analyze in detail the model with an inactive refractory state and the model controlled by a negative feedback loop (Models 1 and 3).

#### ***Sensitivity in Model 1: X with an inactive refractory state.***

In order to study the pulse generator of Model 1 in isolation, that is, independently of the ligand-receptor complex (C) formation, we first studied the peak response of  $X^*$  as a function of a step increase in C (Fig. S11a). For the parameter values we selected, the system was subsensitive, with a Hill coefficient of 0.8, corresponding to a dynamic range ( $EC_{90}/EC_{10}$ ) of 243 (colored lines in Fig. S11a), three times the dynamic range of a Michaelian response (81, black line). We tested three values of  $r_2$  (the rate of inactivation of  $X^*$ , the key parameter controlling the duration of the pulse response), which had no significant impact on the  $n_H$ , but had a strong effect on the  $EC_{50}$  of the response.

Next, we introduced a simple ligand-receptor binding reaction between the step input and the X cycle, using fast or slow ligand-receptor binding rates (Fig. S11b and c). The addition of the ligand-receptor binding reaction increased the sensitivity from 0.8 to 0.9 when we used fast ligand binding rates (reducing the dynamic range to  $\sim 132$ ), and decreased it to 0.7 when we used slow binding rates (increasing the dynamic range to  $\sim 533$ ) (Table S1). In both cases, parameter  $r_2$  had no significant impact on the  $n_H$ , impacting strongly on the  $EC_{50}$  of the response.

These results indicate that the coupling of a ligand-receptor reaction interacts with the subsensitive pulse-generator, in a manner that depends on the speed of this reaction. When binding is fast, the

overall sensitivity is increased, but when binding is slow, it is further decreased. The speed of the binding reaction also affects the degree of the dynamic range displacement; it was much greater with slow binding than fast binding. Thus, we conclude that the intrinsic subsensitivity of the pulse generator does not explain the effects observed in PRESS mode of signaling.

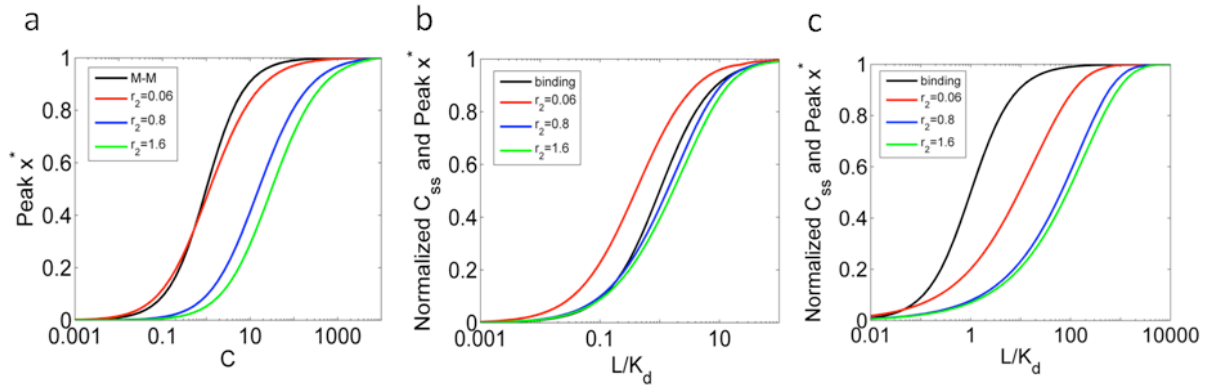

**Figure S11. Sensitivity in Model 1**

X with an inactive refractory state. Parameters:  $X_{tot}=10$ ,  $r_1=0.1$ ,  $r_2=0.06-0.8-1.6$  (red, blue, green lines),  $r_3=0.001$ . a. The isolated cycle of X (no dynamics of ligand-receptor complex, C, formation). Plot shows peak response of  $X^*$  as a function of step increase in C. A Michaelian response (with  $EC_{50}=1$  and  $n_H=1$ ) is included with a black line. b-c. Complete Model 1 (including the dynamics of ligand-receptor complex, C, formation). Plots show peak response of  $X^*$  as a function of the ligand concentration, L (L normalized by the  $K_d$  of the ligand-receptor reaction). Different values of parameter  $r_2$  are included in different colors, as indicated. Rates in b are  $k_+=0.02$  ( $nM \cdot sec^{-1}$ ),  $k_-=0.1$   $sec^{-1}$  and in c  $k_+=0.0002$  ( $nM \cdot sec^{-1}$ ),  $k_-=0.001$   $sec^{-1}$ .

|       | C as the stimulus |       | Fast binding |       | Slow binding |       |
|-------|-------------------|-------|--------------|-------|--------------|-------|
| $r_2$ | $EC_{50}$         | $n_H$ | $EC_{50}$    | $n_H$ | $EC_{50}$    | $n_H$ |
| 0.06  | 1.2               | 0.79  | 0.4          | 0.92  | 9.3          | 0.71  |
| 0.8   | 15.9              | 0.80  | 1.3          | 0.94  | 65.1         | 0.75  |
| 1.6   | 31.3              | 0.81  | 1.7          | 0.92  | 87.2         | 0.73  |

**Table S1. Model 1 sensitivity.**

Characterization of the potency ( $EC_{50}$ ) and sensitivity ( $n_H$ ) for the different curves in Fig. S11, as a function of parameter  $r_2$ , corresponding to Model 1.

**Sensitivity in Model 3: X controlled by a negative feed-back loop (NFBL).**

We performed the same study for Model 3. When considered in isolation, for the parameter values we selected, the peak response of  $X^*$  to a step increase in C (Fig. S12) resulted ultrasensitive, with an  $n_H$  of

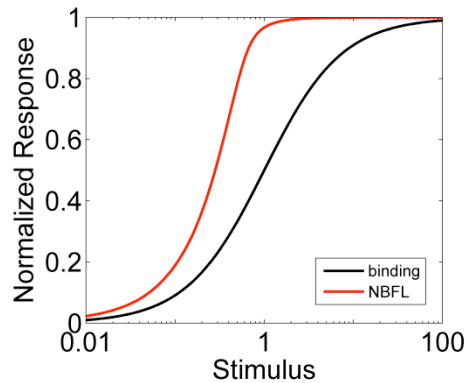

**Figure S12. Sensitivity in Model 3**

X controlled by a negative feed-back loop (NFBL). Parameter values:  $k_{XB}=1$ ,  $K_{XB}=0.01$ ,  $k_{FBB}=5$ ,  $K_{FBB}=100$ ,  $F_B=0.5$ ,  $k_{CX}=5$ ,  $K_{CX}=0.1$ ,  $k_{BX}=6$ ,  $K_{BX}=0.01$ . A Michaelian response (with  $EC_{50}=1$  and  $n_H=1$ ) is included with a black line. The response of the NFBL to a step increase in C (indicated as Stimulus)

1.7, corresponding to a dynamic range of 13.3, and an  $EC_{50}$  of 0.3. When we included the dynamics of ligand-receptor formation (C), the sensitivity of the overall system decreased to 1.3 for fast binding, and even further to 1.2 for slow binding (Table S2), corresponding to a dynamic range of 29.4 and 38.9, respectively. In addition, the dynamic range of C ( $EC_{50}$ ) was displaced from 1 to 4.5 for fast binding and from 1 to 447.6 with slow binding.

| C as the stimulus |       | Fast binding |       | Slow binding |       |
|-------------------|-------|--------------|-------|--------------|-------|
| $EC_{50}$         | $n_H$ | $EC_{50}$    | $n_H$ | $EC_{50}$    | $n_H$ |
| 0.3               | 1.71  | 4.5          | 1.31  | 447.6        | 1.24  |

**Table S2. Model 3 sensitivity.**

Characterization of the displacement ( $EC_{50}$ ) and dynamic range ( $n_H$ ) for the different curves in Fig. S1B and in Fig. S12, corresponding to Model 3.

**General conclusions based on the above studies and the results in the main text:**

- i) The **ligand-receptor binding** reaction has an equilibrium dose-response curve characterized by  $n_H = 1$  and  $EC_{50} = 1$  (dose = ligand/ $K_d$ , response = normalized ligand-receptor complex). The dose-response curve before reaching equilibrium has  $n_H > 1$  and  $EC_{50} > 1$  (see SI Appendix, Section 1), that is, it is displaced to the right and has smaller input dynamic range (increased sensitivity). Therefore, the shape of the binding dose response curve by itself cannot explain the overall characteristics of PRESS systems.
- ii) **Pulse generators** may be subsensitive ( $n_H < 1$ ), such as in Model 1 or ultrasensitive ( $n_H > 1$ ), such as in Model 3, depending on architecture and parameter values.
- iii) The **coupled system** (ligand-receptor  $\rightarrow$  pulse generator) results in a dose-response curve (dose = ligand/ $K_d$ , response = maximum value reached by the pulse) whose characteristics depend on the coupling, and particularly on the dynamics of the ligand-receptor reaction.

If the ligand-receptor reaction is fast (compared to the time-scales of the pulse generator), then we may consider the equilibrium ligand-receptor dose-response curve (with  $n_{H,A \text{ fast}} = 1$ ) as the input to the pulse generator. Therefore, the upper bound of the overall system sensitivity depends exclusively on the sensitivity of the pulse generator. If the ligand-receptor reaction is slow, one may be tempted to think

that the  $n_H$  of the dose-response that acts as the input to the pulse generator has an  $n_{H,A \text{ slow}} > 1$  (according to point i)), resulting in a coupled sensitivity that might be higher for the slow ligand-receptor reaction than for the fast one. This is clearly in disagreement with the results in Tables S1 and S2, where we show that the coupled sensitivity is consistently lower than that of the pulse generator.

What happens is that for each ligand concentration that stimulates the coupled system, the pulse generator reaches its maximum at a different time  $t_{\max}$  (see right panels in Fig. S1 and also Fig. S13b-d). Particularly, for Model 1, if the input stimulus is large, the peak of  $X^*$  occurs early; if the input stimulus is small, the peak of  $X^*$  occurs late. The binding dose-response curve for early times is shifted to the right compared to those of later times, resulting in an effective ligand-receptor curve, that of  $C(t_{\max})$ , that has lower slope than that of  $C$  in early times or even than that of  $C$  in equilibrium (see Fig. S13a, green line).

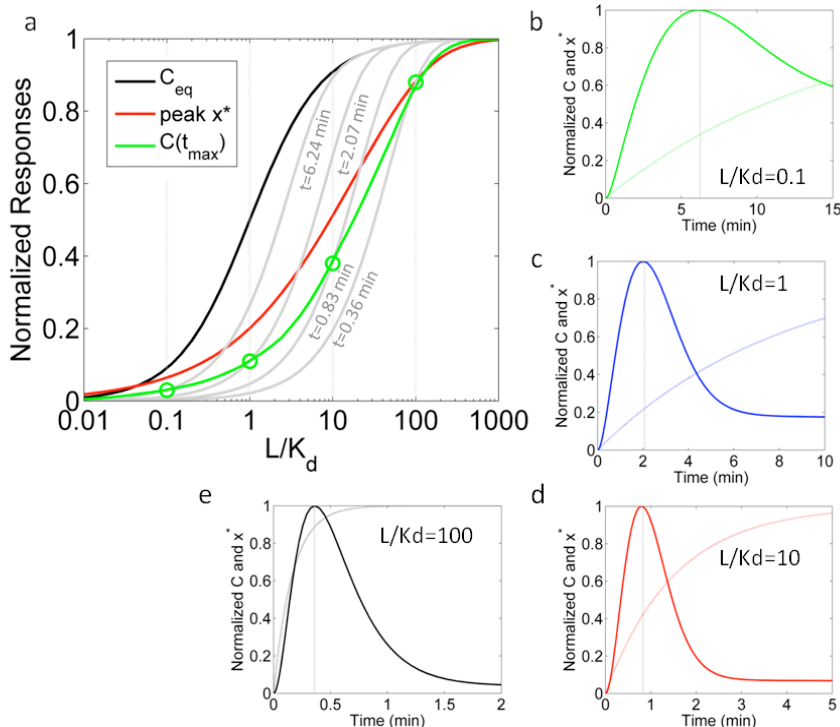

**Figure S13. Graphical explanation of the expansion of the input dynamic range.**

Analysis of the sensitivity of the ligand-receptor system coupled to the pulse generator in Model 1. Parameters:  $X_{\text{tot}}=10$ ,  $r_1=0.1$ ,  $r_2=0.06$ ,  $r_3=0.001$ ,  $k_1=0.001 \text{ sec}^{-1}$ . **a.** Normalized ligand-receptor complex  $C$  in equilibrium (black), at four different times indicated over the figure (grey), and for the times where the maximum of the pulse occurs for each dose,  $C(t_{\max})$  (green). Peak  $X^*$  is included in red. The horizontal axis corresponds to the dose of ligand normalized by the  $K_d$  of the ligand-receptor reaction. The times selected to plot  $C$  versus  $L/K_d$  before equilibrium are the  $t_{\max}$  for  $L/K_d=0.1, 1, 10, 100$ : 6.24, 2.07, 0.83, and 0.36 min respectively. Green circles indicate the intersection of doses  $L/K_d=0.1, 1, 10, 100$ , and  $C$  vs  $L/K_d$  at the listed times, therefore, those circles are over the curve  $C(t_{\max})$ . The curve  $C(t_{\max})$  vs  $L/K_d$  is characterized by  $E_{CS0}=17.7$  and  $n_H=0.9$ . **b-e.** Temporal profiles for normalized  $C$  (thin line) and peak  $X^*$  (thick line) for doses  $L/K_d=0.1, 1, 10, 100$ .

The coupled sensitivity for the ligand-receptor  $\rightarrow$  pulse generator system is then bounded by the  $n_H$  of the curve formed by the  $C(t_{\max})$  values (Fig. S13). So, **for a pulse generator and a slow ligand-receptor reaction, the coupled sensitivity will be lower than that of the pulse generator in isolation, whether or not the sensitivity of this last one is lower or greater than 1.** Therefore, PRESS itself lowers the sensitivity of the overall response, expanding its dynamic range.

In the case of Model 3, **the pulse generator reaches its maximum at similar times  $t_{\max}$ : 0.88, 1.1, 1.3 sec for normalized doses: 1500, 500, 100, as indicated in Fig. S14, resulting in an effective ligand-receptor curve, that of  $C(t_{\max})$ , that has not a much lower slope than that of each  $C(t)$  curve (curves in grey).** The overall result for



this model is then, that the coupled sensitivity is still lower than the sensitivity of the pulse generator considered in isolation but the effect is not as important as when the values of  $t_{\max}$  are very different for different doses (Model 1, Fig. S13).

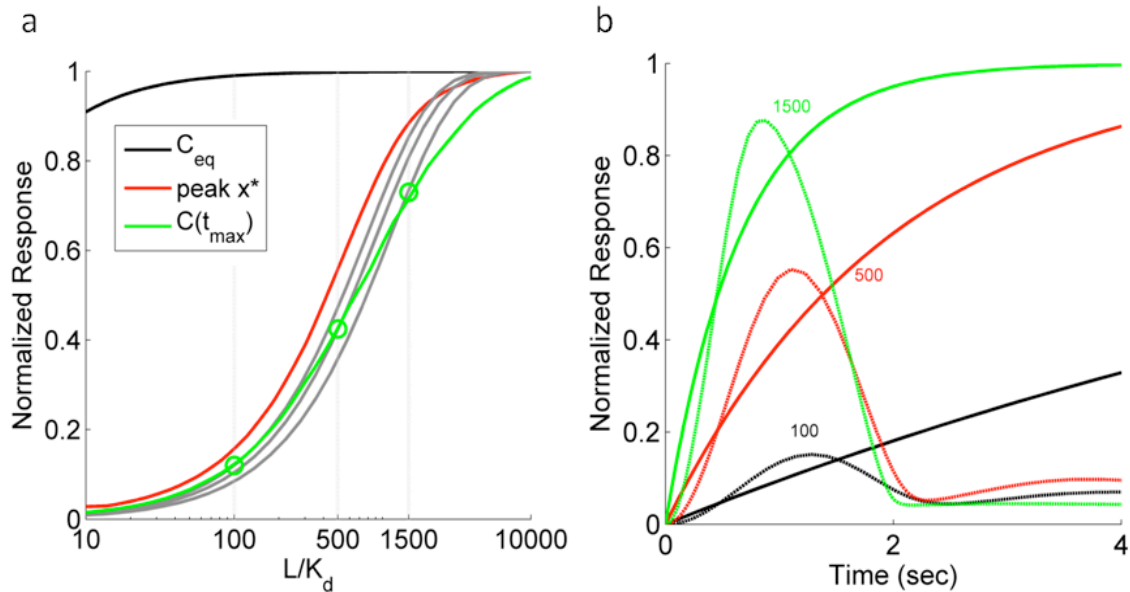

**Figure S14. Graphical explanation of the behavior of Model 3.**

Analysis of the sensitivity of the ligand-receptor system coupled to the pulse generator in Model 3. Parameters:  $k_c=0.001 \text{ sec}^{-1}$ ,  $k_{XB}=1$ ,  $K_{XB}=0.01$ ,  $k_{FBB}=5$ ,  $K_{FBB}=100$ ,  $F_B=0.5$ ,  $k_{CX}=5$ ,  $K_{CX}=0.1$ ,  $k_{BX}=6$ ,  $K_{BX}=0.01$ . **a.** Normalized ligand-receptor complex  $C$  in equilibrium (black), at three different times from right to left 0.88, 1.1, 1.3 sec (grey), and for the times where the maximum of the pulse occurs for each dose,  $C(t_{\max})$  (green). Peak  $X^*$  is included in red. The horizontal axis corresponds to the dose of ligand normalized by the  $K_d$  of the ligand-receptor reaction. The times selected to plot  $C$  versus  $L/K_d$  before equilibrium are the  $t_{\max}$  for  $L/K_d=1500, 500$ , and  $100$ , respectively. Green circles indicate the intersection of doses  $L/K_d=100, 500, 1500$ , and  $C$  vs  $L/K_d$  at the listed times, therefore, those circles are over the curve  $C(t_{\max})$ . The curve  $C(t_{\max})$  vs  $L/K_d$  is characterized by  $EC_{50}=666.4$  and  $n_H=1.15$ . **b.** Temporal profiles for normalized  $C$  and peak  $X^*$  for doses  $L/K_d=100, 500, 1500$ .

#### 4. The effect of noise during PRESS

To determine the effect of noise during PRESS, we run stochastic simulations of the toy model labeled as Model 1 in this SI Appendix, Section2 (the model with an inactive refractory state in Fig. 2 of the main text) varying the number of receptors. It is well known that at low concentrations deterministic simulations based on the law of mass action are, in general, unlikely to be applicable. Therefore we used a stochastic approach to describe the binding kinetics and to account for the noise resulting from the probabilistic character of the (bio)chemical reactions. The goal of the study was to introduce different degrees of noise at the ligand-receptor binding step and then analyze whether this noise was amplified

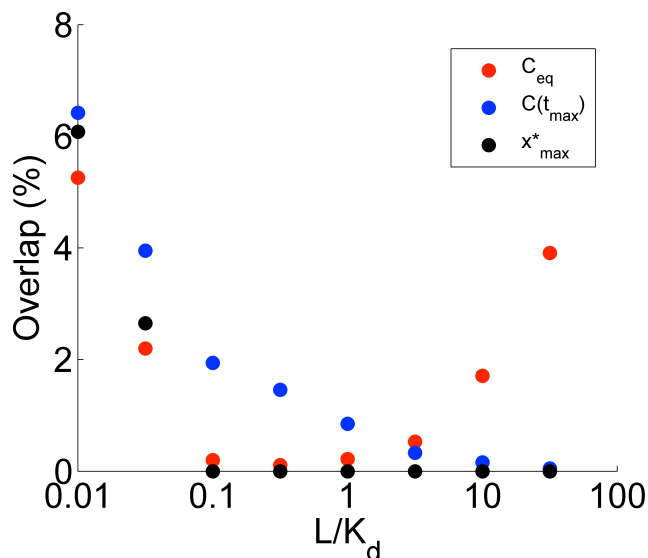

**Figure S15. Percentage of overlap between the stochastic outputs of two consecutive doses for  $R_{tot}=30$ .**

Results of calculating the overlap in the outputs of the 1001 stochastic simulations performed for Model 1 (the model with an inactive refractory state) for low number of receptors (30 receptors per cell), using stochastic methods. Simulations were done in Copasi using its adaptive tau-leaping algorithm. Parameter values:  $k_+=0.0002$  ml/(pmol\*sec),  $k_-=0.001$  1/s,  $r_1=0.01$  ml/(pmol\*sec),  $r_2=0.06$  1/sec,  $r_3=0.001$  1/sec (with 1 pmol/ml = 1 nM). Initial particle numbers: receptor=30,  $x=14536.5$ . Cell volume=  $5e-11$  ml. The overlap was calculated with three different variables: the equilibrium value of the ligand-receptor complex  $C$  ( $C_{eq}$ ) in red, maximum of  $X^*$  ( $X^*_{max}$ ) in black, and  $C$  at the time where  $X^*$  reaches its maximum ( $C(t_{max})$ ) in blue. Labels in horizontal axis indicate the lower dose of the two doses being compared for the overlap, normalized by the  $K_d$  of the ligand-receptor reaction. Doses being compared are (in units of  $K_d$ ): 0.01, 0.03, 0.1, 0.32, 1.0, 3.16, 10, 31.62, 100.

or not by the downstream response. To do that, we run simulations with different number of receptors (low, medium or high) while maintaining constant the number of the rest of species in the system.

We include the results of simulating Model 1 for low, medium, and high number of receptors (30-300-3000), using stochastic methods, in Fig. S2. We performed numerical simulations in Copasi 4.11 (4) using its adaptive tau-leaping algorithm. Importantly, we defined parameter  $r_1$  ( $x^*$  activation rate) as  $0.1/\text{initial free receptor}$ , and therefore its value was  $0.1/30$ ,  $0.1/300$ , and  $0.1/3000$ , respectively. Thus, each bound receptor has a stronger activation capacity when there are only 30 total receptors than when there are 300 or 3000. In this way, the effective activation rate of  $X^*$  is comparable between the simulations with different number of receptors.

As expected, the effect of noise is much more evident when the number of receptors is low, see Fig. S2, as can be seen both in the temporal profiles on the right panels, and in the standard deviation from 1001 simulations plotted

on the left panels. The square of the coefficient of variation plotted in the bottom panel indicates that for the three variables,  $C_{ss}$  (red curves),  $C(t_{max})$  (blue curves), and peak  $X^*$  (black curves), lower receptor number results in higher  $CV^2$  for the whole range of doses considered. Also, for the three amounts of receptors considered (30 in solid lines, 300 in dashed lines, and 3000 in dotted lines), the curve of  $C_{ss}$  is lower than that of peak  $X^*$ , and peak  $X^*$  is lower than the curve for  $C(t_{max})$ . This result suggests that even in the case of very low number of receptors (30 per cell), which introduce a significant noise at the level of occupied receptor (Fig. S2F), the pulse generator downstream of the receptor did not amplify it and therefore the improvement gained by PRESS is not lost or masked by the effects of noise.

In Fig. S15, we show the percentage of overlap between the outputs of 1001 stochastic simulations for two consecutive doses,  $L_i/K_d$  and  $L_{i+1}/K_d$ , being  $L_{i+1}/K_d \sim 3 * L_i/K_d$ , evaluated for  $C_{eq}$  (red),  $C(t_{max})$  (blue) and  $X^*_{max}$  (black), in the case of low number of receptors (30 receptors per cell). The aim of this figure is to evaluate if two doses can be identified as different doses based on the information given by each variable,  $C_{eq}$ ,  $C(t_{max})$ ,  $X^*_{max}$ , particularly in the region of high doses ( $L/K_d > 1$ ). The results in Fig. S15 indicate even in this case with significant noise at the level of occupied receptor, variable  $X^*_{max}$  has lower overlap than  $C_{eq}$ , supporting that the improvement gained by PRESS is not lost by the effects of noise.

### 5. Mathematical model to study the sensing of a stationary spatial gradient

In what follows we present two alternative mathematical descriptions for the variable  $\Delta$ . In Description 1 we derived the steady-state concentration of  $\alpha F$  as an approximate solution to the diffusion equation from a point source, with, and also without, reflecting boundary conditions on the sensing sphere. Combining this solution with the normalized bound receptor function we derived the variable  $\Delta$  (difference of bound receptors at the front and at the back). In Description 1,  $\Delta$  depends on three combinations of parameters related the average concentration sensed by the cell, the ratio between the radius of the cell and the distant to the source, and the ligand-receptor unbinding rate. In Description 2, we derived variable  $\Delta$  in terms of the maximal and minimal ligand concentrations sensed by the cell, without relating them by any particular function (i.e. without specifying the profile of the gradient). In this case,  $\Delta$  still depends on the ligand-receptor unbinding rate, and on the maximal and minimal ligand concentrations. Description 1 is based on a given source-sensing cell pair, while Description 2 is based on the local environment sensed by the cell. Both descriptions are easily related to one another.

#### 5.1 An analytical expression for the $\alpha F$ gradient generated by a point source, and for the variable $\Delta$ (Description 1)

As in Segall (5), the cell is modeled as an impermeable sphere of radius  $a$ , with  $d$  the distance from the center of the sphere to the point source of  $\alpha F$ . There is azimuthal symmetry with respect to the line between the center of the sphere and the point source. The concentration at any point on the sphere will vary with the angle,  $\theta$ , between the line connecting the center of the sphere to the point source and the line connecting the center of the sphere to the point on the surface. The point over the sphere that is nearest the source is indicated with an **f** (front,  $\theta = 0$ ) and the point that has the greatest distance to the source is indicated with a **b** (back,  $\theta = \pi$ ).

An approximate solution to the diffusion equation with a point source and given reflecting boundary conditions on the sphere (5) is:

$$\alpha F(\theta) = \frac{q}{4\pi D d} \left[ \sum_{j=0}^{\infty} (2j + 1) \left(\frac{a}{d}\right)^j \frac{P_j(\cos \theta)}{j+1} \right] \quad (3)$$

where  $\alpha F(\theta)$  is the steady-state concentration of  $\alpha F$  as a function of the position over the cell surface,  $q$  is the rate of release of alpha-factor from the point source,  $D$  is the  $\alpha F$  diffusion coefficient, and  $P_j$  is the Legendre polynomial of order  $j$  (5).

We model the ligand-receptor binding with the following reaction:

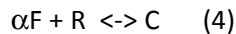

where  $\alpha F$  is the ligand (alpha-factor),  $R$  is the membrane receptor assumed to have a uniform density over the cell surface,  $C$  is the complex ligand-receptor, and  $k_+$  and  $k_-$  are the binding and unbinding rates, respectively. The dissociation constant  $K_d$  is defined as  $k_-/k_+$  and represents the ligand concentration that produces a bound receptor level that is one-half of its maximum. The total concentrations of receptor and ligand in the system are assumed to be constant,  $R_{\text{tot}} = [R] + [C]$ ,  $\alpha F_{\text{tot}} = [\alpha F] + [C]$ . Thus, only one concentration of the three ( $[R]$ ,  $[\alpha F]$ , and  $[C]$ ) is independent; the other two may be determined from

$R_{\text{tot}}$ ,  $\alpha F_{\text{tot}}$  and the independent concentration. The kinetics of this system can be solved analytically. Choosing  $[C]$  as the independent concentration and representing the concentrations without the brackets for brevity (e.g.  $R = [R]$ ), the kinetic rate equation can be written as:

$$\frac{dC}{dt} = k_+ \alpha F R - k_- C \cong k_+ \alpha F_{\text{tot}} (R_{\text{tot}} - C) - k_- C = k_+ \alpha F (R_{\text{tot}} - C) - k_- C \quad (5)$$

where we have assumed that  $[\alpha F] \sim \alpha F_{\text{tot}}$ , meaning that the consumption of ligand in the ligand-receptor reaction is negligible compared with  $\alpha F_{\text{tot}}$ .  $\alpha F_{\text{tot}}$  is then the function  $\alpha F(\theta)$  given by Eq. (3). The solution for Eq. (5) is:

$$C(\theta, t) = C_{\text{eq}} \left( 1 - \exp\left(-\frac{t}{\tau}\right) \right), \quad (6)$$

with

$$C_{\text{eq}} = R_{\text{tot}} \frac{\alpha F(\theta)/K_d}{\frac{\alpha F(\theta)}{K_d} + 1} \quad (7)$$

being the steady-state value for  $C$  and

$$\tau = [k_- (1 + \alpha F(\theta)/K_d)]^{-1} \quad (8)$$

the time required for the bound receptor  $C$  to rise from zero to  $1-1/e$  (that is, 63.2%) of its final steady-state value.

Combining Eqs. (3), (6), (7), and (8) we obtain that the normalized bound receptor,  $C/R_{\text{tot}}$  as a function of  $\theta$  and  $t$  depends on the following combination of parameters:

$$p_1 = \frac{q}{\frac{4\pi Dd}{K_d}}; p_2 = \frac{a}{d}; p_3 = k_-. \quad (9)$$

Parameter  $p_1$  combines parameters related to the ligand source ( $q;D$ ), the distance to the source ( $d$ ), and  $K_d$ , and indicates the average concentration sensed by the cell in multiples of  $K_d$ , for instance,  $p_1=1$  means that the cell feels a concentration of about  $1 \times K_d$ . Parameter  $p_2$  is a geometrical parameter defined as the ratio between the radius of the spherical cell and the distance from the center of the cell to the point source.  $p_1$  and  $p_2$  are dimensionless parameters. Parameter  $p_3$  is the ligand-receptor unbinding rate and has units of 1/time. The three parameters are always positive, and  $p_2$  is such that  $0 < p_2 < 1$ .

For  $p_1 = 10$  and  $p_2 = 0.3$  (the values used in most of the paper), the total numbers of bound receptors in steady state, for the hemispheres facing and away from the point source, were calculated following (5) by integration over the angles  $0$  to  $\pi/2$  radians ( $0$  to  $90$  degrees) and  $\pi/2$  to  $\pi$  radians ( $90$  to  $180$  degrees), respectively. The total number of receptors was assumed to be  $8000$  (5). The hemisphere nearest the source has  $3720$  occupied receptors and the hemisphere away from the source has  $3531$  occupied receptors. The difference between the two sides,  $189$  receptors, is  $2.6\%$  of the total number of occupied receptors.

The variable  $\Delta$  is defined as  $\Delta(t) = C(\theta = 0, t) - C(\theta = \pi, t)$  (difference of bound receptors at the front and at the back). The effectiveness of PRESS in the context of gradient sensing depends on how much (amplitude) and for how long (duration) lasts the overshoot of  $\Delta(t)$ .  $\Delta$  depends on parameters  $p_1$ ,  $p_2$ , and  $p_3$ .

By combining Eqs. (3), (6), (7), and (8) we numerically compute Delta and determine that the overshoot amplitude increases with the concentration of ligand (which increases  $p_1$ ). This is because  $\Delta_{eq}$  has a biphasic behavior with  $p_1$  while  $\Delta_{max}$  has not (Fig. S16a inset).  $\Delta_{eq}$  peaks at about  $p_1=1$ , i.e. at an average concentration of  $\alpha F$  of about the  $K_d$ . On the other hand,  $\Delta_{max}$  is virtually indistinguishable

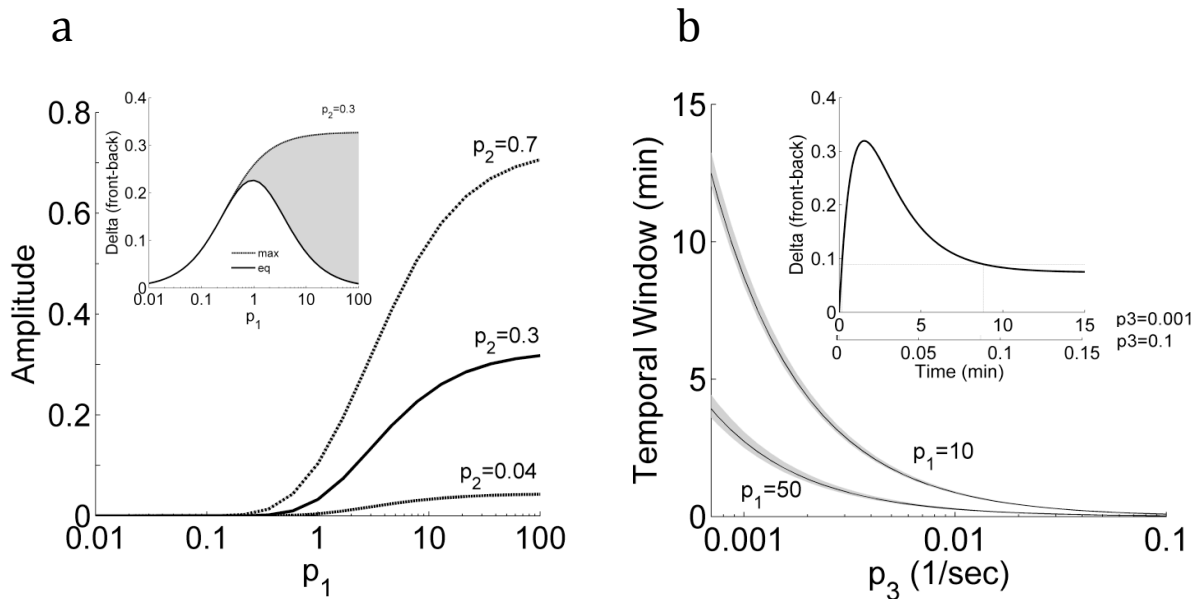

**Figure S16. Characterization of PRESS applied to gradient detection.**

**a.** Amplitude of Delta's overshoot as a function of  $p_1$  (average ligand concentration relative to the  $K_d$ ) for the indicated values of  $p_2$ . Overshoot occurs at  $p_1$  greater than  $\sim 1$ , providing an advantage of PRESS over equilibrium signaling.  $p_3$  does not affect  $\Delta_{eq}$  or  $\Delta_{max}$ . **Inset.** Dependency of  $\Delta_{eq}$  (solid line) and  $\Delta_{max}$  (dashed line) on parameter  $p_1$  (average concentration of  $\alpha F$ ) for  $p_2=0.3$ .  $\Delta_{eq}$  is biphasic with  $p_1$  while  $\Delta_{max}$  is monotonic. The shaded area represents Delta's overshoot. **b.** Temporal window during which Delta overshoots  $\Delta_{eq}$  as a function of parameter  $p_3$  (the time scale of the  $\alpha F$  binding reaction), for  $p_2=0.3$  and the indicated values of  $p_1$ . The width of each line (shaded) marks the region between two extremes yeast cell sizes (cells from 1.6 to 6.4  $\mu\text{m}$  diameter, located at a distance from the source of 6.7  $\mu\text{m}$ ), corresponding to  $p_2$  from 0.12 to 0.48. **Inset** shows Delta versus time for the two values of  $p_3$  indicated in the x-axis ( $p_1=10$ ,  $p_2=0.3$ ). Graph shows that the temporal profile is independent of  $p_3$ , except for the scale of time. We defined the temporal window for PRESS as the interval during which Delta is higher in more than 20% of  $\Delta_{eq}$ .

from  $\Delta_{eq}$  for low values of  $p_1$ , but at  $p_1$  approaching 1  $\Delta_{max}$  diverges from  $\Delta_{eq}$  increasing asymptotically to a maximum  $\Delta_{max}$ . Consequently, at values above 1, increasing  $p_1$  increases the amplitude of the overshoot. In contrast, its duration decreases with  $p_1$  (Fig. S16b). Thus, even though high levels of signal provide greater overshoot amplitude for PRESS, the time window available for PRESS is reduced.

Increasing  $p_2$  for a given value of  $p_1$  (which translates into increasing the sensing cell size), increases both  $\Delta_{max}$  and  $\Delta_{eq}$ , effectively improving the chances of the cell of detecting differences between front

and back bound receptor, both at equilibrium and prior to it, but it does not make PRESS better than equilibrium signaling (Fig. S16a).

Most interestingly, the duration of Delta's overshoot is most strongly affected by  $p_3$  (Fig. S16b). For Cell 1 in our example of Fig 3B in the main text, a value of  $p_3$  100 times faster than the actual  $\alpha F$  binding reaction reduces the time window for PRESS from about 6 minutes to about 0.06 minutes (3.6 seconds) (inset in Fig. S16b). Thus, the slower  $p_3$ , the more time there is for PRESS. On the other hand,  $p_3$  does not affect the amplitude of the overshoot.

### 5.1.1 A simplified formula for the $\alpha F$ gradient generated by a point source, and the variable Delta

If the effect of the reflecting boundary conditions on the sensing sphere is not considered, then the steady-state solution for the problem of diffusion from a point source is simplified to:

$$\alpha F(\theta) = \frac{1}{4\pi Dd} \frac{1}{\sqrt{1+(a/d)^2-2(a/d)\cos\theta}}, \quad (10)$$

In terms of parameters  $p_1$ ,  $p_2$  and  $p_3$ , and for the case with reflecting boundary conditions, we have:

$$\frac{\alpha F(\theta)}{K_d} = p_1 \left[ \sum_{j=0}^{\infty} (2j+1)(p_2)^j \frac{P_j(\cos\theta)}{j+1} \right], \quad (11)$$

and for the case without:

$$\frac{\alpha F(\theta)}{K_d} = p_1 \frac{1}{\sqrt{1+(p_2)^j-2p_2\cos\theta}} \quad (12)$$

This last case results in  $\alpha F_f = \alpha F(\theta = 0) = p_1/(1 - p_2)$  and  $\alpha F_b = \alpha F(\theta = \pi) = p_1/(1 + p_2)$ . In Fig. S17 we compare the  $\alpha$ -factor profiles over the sensing cell surface with and without reflecting boundary conditions, i.e. we compare Eqs. (11) and (12). If the presence of the sphere is taken into account in the diffusion problem (Eq. (11)), the differences between front and back are greater than if not.

With  $\alpha F$  given by Eq. (12) we obtain:

$$\frac{C_f}{R_{tot}} = \frac{p_1}{p_1+(1-p_2)} (1 - \exp(-t/\tau_f)) \quad (13)$$

$$\frac{C_b}{R_{tot}} = \frac{p_1}{p_1+(1+p_2)} (1 - \exp(-t/\tau_b)) \quad (14)$$

where

$$\tau_f = \frac{1-p_2}{p_3(p_1+1-p_2)} \quad (15)$$

$$\tau_b = \frac{1+p_2}{p_3(p_1+1+p_2)} \quad (16)$$

resulting in

$$\Delta(t) = \Delta_{eq} + f(t) \quad (17)$$

$$\Delta_{eq} = \frac{2p_1p_2}{(1+p_1)^2-p_2^2} \quad (18)$$

$$f(t) = \frac{p_1}{1+p_1+p_2} \exp\left(-tp_3 \frac{1+p_1+p_2}{1+p_2}\right) - \frac{p_1}{1+p_1-p_2} \exp\left(-tp_3 \frac{1+p_1-p_2}{1-p_2}\right) \quad (19)$$

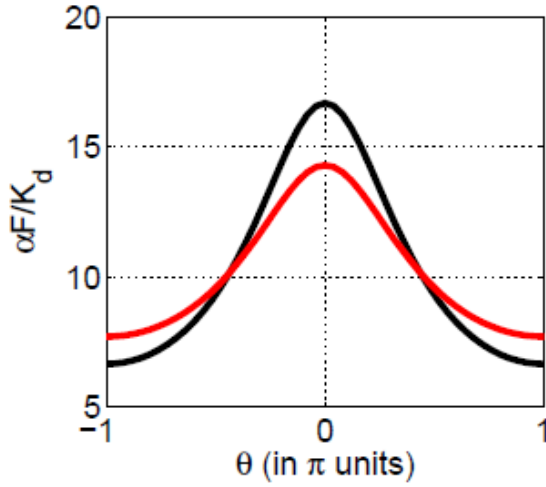

**Figure S17.  $\alpha$ -factor profiles over the sensing cell surface.**

Including (black) not (red) reflecting boundary conditions.  $\alpha F$  is normalized by  $K_d$  and  $\theta$  is plotted in  $\pi$  units.

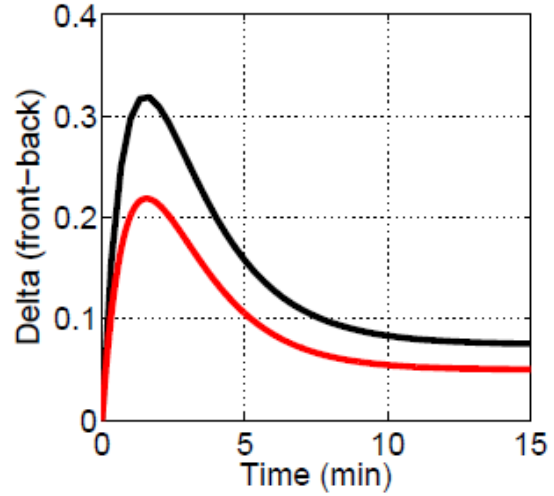

**Figure S18. Delta vs. time**

Data was calculated with (black) and without (red) reflecting boundary conditions, for  $p_1=10$ ,  $p_2=0.3$ , and  $p_3=0.001$  1/sec.

In Fig. S18 we compare the variable Delta calculated using Eq. (11) or Eq. (12), we can see that in both cases there is a time window where Delta is greater than its steady-state value, meaning that the feature of the overshoot in Delta does not depend on the use or not of reflecting boundary conditions over the sensing sphere.

We make use of this simplified scheme to analytically explain some of the features in Fig. S17. From Eq. (18) we see that  $\Delta_{eq}$  depends on parameters  $p_1$  and  $p_2$  but not on  $p_3$ . Computing the derivative of  $\Delta_{eq}$  with respect to  $p_1$  and equaling to zero, we obtain that  $\Delta_{eq}$  reaches a maximum at  $p_1 \sim (1 - p_2^2)^{1/2}$ , it increases with  $p_1$  for  $p_1 < p_1 \sim$ , then decreases. For a small value of parameter  $p_2$ ,  $p_1 \sim$  is close to 1, for instance, for  $p_2 = 0.3$  (the value  $p_2$  used in the majority of the paper),  $p_1 \sim = 0.95$ . The derivative of  $\Delta_{eq}$  with respect to  $p_2$  is always positive, meaning that  $\Delta_{eq}$  always increases with  $p_2$ .

Using Eqs. (17)-(19) we can explicitly compute the time  $t_+$  where Delta becomes greater than  $\Delta_{eq}$ , i.e. when  $f(t)$  becomes positive:

$$t_+ = \frac{1-p_2^2}{2p_1p_2p_3} \log\left(\frac{1+p_1+p_2}{1+p_1-p_2}\right) \quad (20)$$

and the time  $t_{max}$  where Delta reaches a maximum:

$$t_{max} = \frac{1-p_2^2}{2p_1p_2p_3} \log\left(\frac{1+p_2}{1-p_2}\right) \quad (21)$$

The maximum value reached by Delta is given by  $\Delta_{max} = \Delta(t = t_{max})$ :

$$\Delta_{max} = \Delta_{eq} \left( 1 + \frac{p_1}{1+p_2} \exp\left[\frac{-(1-p_2)(1+p_1+p_2)}{2p_1p_2} \log\left(\frac{1+p_2}{1-p_2}\right)\right] \right). \quad (22)$$



$\Delta_{\max}$  depends on parameters  $p_1$  and  $p_2$  but not on  $p_3$ . By plotting  $\Delta_{\max}$  versus parameter  $p_1$  for different values of  $p_2$ , or  $\Delta_{\max}$  versus parameter  $p_2$  for different values of  $p_1$  (not shown), we can see that it increases monotonically with both  $p_1$  and  $p_2$ . From this last equation we see that for small values of  $p_1$ , the second term inside the parenthesis is very small resulting in  $\Delta_{\max} \sim \Delta_{\text{eq}}$ .

## 5.2 An analytical expression for the variable Delta (Description 2)

The effectiveness of PRESS in the context of gradient sensing depends on the **amplitude** and **duration** of the overshoot of  $\Delta(t)$ . Thus, we developed a mathematical analysis to describe the evolution over time of  $\Delta(t)$ , assuming homogeneously distributed receptors and simple binding kinetics.  $\Delta(t)$  depends on the properties of the gradient: the maximum and minimum ligand concentrations sensed by the cell (in the case of  $\alpha F$ ,  $\alpha F_f$  and  $\alpha F_b$ , the front and back  $\alpha F$  concentrations, respectively), as well as of the sensing cell: the binding and unbinding rate for the ligand-receptor reaction,  $k_+$  and  $k_-$ . Normalizing by  $R_{\text{tot}}$  we obtain  $\Delta(t)$  as follows:

$$\Delta(t) = \frac{\widetilde{\alpha F}_f - \widetilde{\alpha F}_b}{(1 + \widetilde{\alpha F}_f)(1 + \widetilde{\alpha F}_b)} + \frac{\widetilde{\alpha F}_b}{1 + \widetilde{\alpha F}_b} \exp\{-t[k_-(1 + \widetilde{\alpha F}_b)]\} - \frac{\widetilde{\alpha F}_f}{1 + \widetilde{\alpha F}_f} \exp\{-t[k_-(1 + \widetilde{\alpha F}_f)]\}$$

Where  $\widetilde{\alpha F}_f$  and  $\widetilde{\alpha F}_b$  are the front and back concentrations of  $\alpha F$  normalized by the dissociation constant,  $K_d$ . The first term (in black) does not depend on time, and it corresponds to the value of  $\Delta(t)$  at equilibrium,  $\Delta_{\text{eq}}$ . The second and third terms (in blue and red) correspond to the dynamics of binding at the back (in blue) and the front (in red). We then derived a formula for  $\Delta_{\max}$ , the maximum value of  $\Delta(t)$ , its difference with  $\Delta_{\text{eq}}$  define the overshoot; and  $t_{\max}$ , the time of  $\Delta_{\max}$ , with which we obtained the overshoot's duration (arbitrarily defined as temporal window during which  $\Delta(t)$  is 20% larger than  $\Delta_{\text{eq}}$ ).

The function  $\Delta(t)$  can be characterized by:

- 1) its initial value,  $\Delta(t=0)=0$ ;
- 2) its asymptotic value,  $\Delta(t \rightarrow \infty)$ :

$$\Delta_{\text{eq}} = \frac{\widetilde{\alpha F}_f - \widetilde{\alpha F}_b}{(1 + \widetilde{\alpha F}_f)(1 + \widetilde{\alpha F}_b)};$$

- 3) the time  $t_{\max}$  where  $\Delta(t)$  reaches a maximum:

$$t_{\max} = \frac{1}{k_-(\widetilde{\alpha F}_f - \widetilde{\alpha F}_b)} \log\left(\frac{\widetilde{\alpha F}_f}{\widetilde{\alpha F}_b}\right);$$

- 4) the maximum value reached by  $\Delta(t)$ , given by  $\Delta_{\max} = \Delta(t = t_{\max})$ :

$$\begin{aligned} \Delta_{\max} = \Delta_{\text{eq}} &+ \left\{ \frac{\widetilde{\alpha F}_b}{1 + \widetilde{\alpha F}_b} \exp\left[-\frac{1 + \widetilde{\alpha F}_b}{(\widetilde{\alpha F}_f - \widetilde{\alpha F}_b)} \log\left(\frac{\widetilde{\alpha F}_f}{\widetilde{\alpha F}_b}\right)\right] \right. \\ &\left. - \frac{\widetilde{\alpha F}_f}{1 + \widetilde{\alpha F}_f} \exp\left[-\frac{1 + \widetilde{\alpha F}_f}{(\widetilde{\alpha F}_f - \widetilde{\alpha F}_b)} \log\left(\frac{\widetilde{\alpha F}_f}{\widetilde{\alpha F}_b}\right)\right] \right\} \end{aligned}$$

- 5) the time  $t_r$  where  $\Delta$  becomes greater than  $\Delta_{\text{eq}}$ :

$$t_+ = \frac{1}{k_-(\bar{\alpha}F_{f-} \bar{\alpha}F_b)} \log \left( \frac{\bar{\alpha}F_f}{\bar{\alpha}F_b} \frac{1 + \bar{\alpha}F_b}{1 + \bar{\alpha}F_f} \right)$$

6) the temporal window where Delta is greater than Delta<sub>eq</sub>, approximated as  $\Delta t = 2^*(t_{\max} - t_+)$ :

$$\Delta t = \frac{2}{k_-(\bar{\alpha}F_{f-} \bar{\alpha}F_b)} \log \left( \frac{1 + \bar{\alpha}F_f}{1 + \bar{\alpha}F_b} \right)$$

The main quantities in the context of PRESS and the overshoot in Delta(t) are Delta<sub>max</sub>, Delta<sub>eq</sub> and the temporal window  $\Delta t$ , where Delta(t) is greater than Delta<sub>eq</sub>. Delta<sub>max</sub> and Delta<sub>eq</sub> depend on  $\bar{\alpha}F_f$  and  $\bar{\alpha}F_b$  only, and  $\Delta t$  depends on those two quantities and also on k. Linear and exponential gradients are represented in the ( $\bar{\alpha}F_b$ ,  $\bar{\alpha}F_f$ ) plane as lines parallel to the identity with different y-intercepts, or lines with zero y-intercept and different slopes, respectively, as described with the following equations:

linear gradient:  $\bar{\alpha}F = a_1x + b_1$ ,  $\bar{\alpha}F_f = \bar{\alpha}F_b + a_1(x_f - x_b)$ ,  $\bar{\alpha}F_f = \bar{\alpha}F_b + \text{const}_1$ ,

exponential gradient:  $\bar{\alpha}F = a_2e^{-x/b_2}$ ,  $\bar{\alpha}F_f = \bar{\alpha}F_b e^{-\frac{(x_f - x_b)}{b_2}}$ ,  $\bar{\alpha}F_f = \bar{\alpha}F_b * \text{const}_2$  (with  $\text{const}_2 > 1$ )

The biological relevance of the overshoot's duration depends on the time-scale of the processes downstream to the ligand-binding reaction (i.e., is the downstream process fast enough to generate a response during the temporal window where Delta(t) > Delta<sub>eq</sub>?). The values of Delta(t) are differences between the fraction of bound receptor at the front and back, and whether a given value of Delta provides enough directional information to detect a given gradient depends on the particular mechanism of polarization.

To show the behavior of Delta<sub>eq</sub>, Delta<sub>max</sub> and the overshoot's duration as a function of the gradient, we focused on the case of yeast mating pheromone gradient detection. In **Fig. S3 A-C** we show heatmaps where the color scale indicates Delta<sub>eq</sub>, Delta<sub>max</sub> and the overshoot's duration, respectively, for a range of gradients ( $\alpha F$  front,  $\alpha F$  back pair combinations) in a region of  $\alpha F$  concentrations from 1 to 20 K<sub>d</sub>s. For Delta<sub>eq</sub> and Delta<sub>max</sub>, given a value of  $\alpha F$  at the back, increasing  $\alpha F$  at the front improves both Delta<sub>eq</sub> and Delta<sub>max</sub> (and the same is true for a given value of  $\alpha F$  front but decreasing  $\alpha F$  back), indicating that, as expected, a more pronounced gradient improves Delta<sub>eq</sub> and Delta<sub>max</sub>.

We considered the profile of Delta(t) for a cell located in an exponential gradient at an average ligand concentration of  $\sim 1 \times K_d$  (see Fig. 3, main text). In this case, a cell reaches a value of Delta<sub>eq</sub> = 0.23. For heuristic reasons, we used this value as reference point, assuming that a value of Delta of 0.23 or larger provides enough front-back difference to distinguish the direction of the gradient, and that values lower than 0.23 result in suboptimal gradient detection. The region to the left of the contour line in **Fig. S3 A** gives all combinations of  $\alpha F$  front- $\alpha F$  back that would lead to consistent gradient detection if only equilibrium information is used. However, the region of  $\alpha F$  front- $\alpha F$  back combinations where Delta<sub>max</sub> is greater than 0.23 is much larger than that obtained if we consider equilibrium binding information (dashed contour line in **Fig. S3 B** marks combinations with Delta<sub>max</sub> of 0.23). In the region between the Delta<sub>eq</sub> and Delta<sub>max</sub> lines of 0.23, pre-equilibrium information is sufficient (Delta<sub>max</sub> > 0.23) but equilibrium information is not (Delta<sub>eq</sub> < 0.23). In **Fig. S3 C** we show the temporal window where this amplification of the differences between front and back occurs. For the region between the Delta<sub>eq</sub> and

$\Delta_{\max}$  lines, the temporal window is not smaller than 6.8 min. The duration of  $\Delta$ 's overshoot is strongly affected by  $k$ : a value of  $k$  100 times faster than the reported  $\alpha F$  binding reaction reduces it by a factor 100 (duration reaches a maximum of 15 min for  $k=0.001 \text{ sec}^{-1}$ , but only of 0.15 min for  $k=0.1 \text{ sec}^{-1}$ ). Thus, the slower  $k$ , the more time available for PRESS. On the other hand,  $k$  does not affect the amplitude of the overshoot (see formula for  $\Delta_{\max}$  above).

With this analysis, we studied  $\Delta(t)$  in different gradient situations. We show that the average concentration establishes a tradeoff between overshoot's amplitude and duration.  $\Delta_{\max}$  is larger at higher average ligand concentrations, but the temporal windows are shorter (see grey lines in **Fig. S3 B and C**). The optimal condition depends on the downstream process time scale and sensitivity.

Summarizing:

- $\Delta_{\text{eq}}$  and  $\Delta_{\max}$  depend only on  $\bar{\alpha F}_b$  and  $\bar{\alpha F}_f$ . A higher average  $\alpha F$  concentration and a more pronounced gradient are conditions that favor  $\Delta_{\text{eq}}$  and  $\Delta_{\max}$ .
- The temporal window for PRESS depends on  $\bar{\alpha F}_b$  and  $\bar{\alpha F}_f$  and also on the unbinding rate for the receptor- $\alpha F$  reaction,  $k$ . (at a fixed  $K_d$ ). It is shorter for higher averages of  $\alpha F$  concentration and for faster unbinding rates.

## 6 Supplemental experimental procedures

### 6.1 Strains and plasmids.

Strains are detailed in Table S3. YA379 was used as the parental strain, which is a  $\Delta bar1$  strain derived from YAS245-5C (*can1::HO-CAN1 ho::HO-ADE2 ura3 ade2 leu2 trp1 his3*), which in turn is a W303-1a descendant (6).

ESY3136 was made by transforming YA379 using a PCR product containing the YFP gene followed by the *S. pombe his5+* gene. We directed recombination downstream of the *STE20* gene using primers with 40 nt of homology with the 3' end of the *STE20* ORF (7). MWY003 was made in two steps. First, *STE5* was deleted using a PCR product containing the nourseothricin (NAT) resistance gene obtained using primers with 40 nt of homology with the 5' and 3' ends of the *STE5* ORF. Then, this strain was transformed with a pRS404 plasmid containing the *STE5* gene (from -1193 to the end of the ORF) followed by three copies of *YFP*, linearized at the *STE5* promoter with *PacI*. The fluorescence level of MWY003 is three times that of other colonies isolated from this transformation, suggesting that three integrations of the *STE5*-YFPx3 construct occurred. YAB3725 was made by transforming YA379 with plasmid pBB-Ste2(T305)-CFP linearized with *Clal*. pBB-Ste2(T305)-CFP is a pRS406 based plasmid that contains a 514 nt fragment of *STE2* (from nt +402 to +916 counting from the START codon) followed by *CFP*. In this plasmid, *Clal* cuts within the *STE2* fragment, and therefore, it integrates at the *STE2* locus, generating a strain that expresses only a Ste2 protein truncated at T305 followed by CFP.

**Table S3. Strains.**

| Strain  | Relevant Genotype                                                                        | Reference         |
|---------|------------------------------------------------------------------------------------------|-------------------|
| YA379   | <i>MATa <math>\Delta bar1</math></i>                                                     | (6)               |
| ESY3136 | <i>MATa <math>\Delta bar1 ste20::STE20</math>-YFP::his5+</i>                             | This study        |
| MWY003  | <i>MATa <math>\Delta bar1 \Delta ste5::Nat</math>, (<i>trp1::STE5</i>-YFPx3::TRP1)x3</i> | Peter Pryciak lab |
| YAB3725 | <i>MATa <math>\Delta bar1 ste2::P_{STE2} STE2(T305)</math>-CFP::URA3</i>                 | This study        |
| YGV5097 | <i>MATa <math>\Delta bar1 BEM1::BEM1</math>-3xmNeonGreen-HIS3MX6</i>                     | This study        |

We made YGV5097 by PCR-based gene tagging (7) of the *BEM1* ORF in strain YA379. For the PCR, we used pFA6a-mNG(3x)-KANMX6 as template and two primers with 40nt homology 5' ends to the 3' end of *BEM1* ORF and its 3'UTR, respectively. We made pFA6a-mNG(3x)-KANMX6 in two steps. First, we designed and ordered the synthesis of a DNA sequence coding for a tandem repeat of three monomeric NeonGreen (mNG) fluorescent proteins (8) flanked by a 5' *PacI* and 3' *AclI* (Integrated DNA Technologies, Inc., Coralville, Iowa). For this design we optimized codon usage for yeast. For preventing

intra-repeat recombination, we designed each copy of mNG to use slightly different codons. The resulting plasmid is called pUCIDT-mNG(3x). In a second step, we subcloned a PaeI and AseI cut fragment containing mNG-(3X) from pUCIDT-mNG(3x) into the pFA6-GFP-HIS3MX6 backbone also digested with PaeI and AseI to release the GFP sequence. Finally, the PCR product was used for transformation of ACLY379.

## **6.2 Quantification of Polarization Times**

Microscopy experiments were performed as described elsewhere (9, 10). Exponential growing cells were placed in 384-well glass-bottom plates pre-treated with 1mg/ml of concanavalin A (Sigma) to affix cells. Images were acquired using an Olympus FV1000 confocal module mounted on an Olympus IX-81 microscope, with an Olympus UplanSapo 63x objective (NA = 1.35).

Cells were stimulated with 1 $\mu$ M  $\alpha$ -factor at time zero and the same field was followed for up to 2.5 hours. Transmission and YFP (excitation 515nm, emission 530-630nm) images were analyzed by our software Cell-ID (10), identifying individual cells. Using our package Rcell (<http://cran.r-project.org/>), we created transmission image montages as the ones showed in Fig 3F. Based on these montages, the position in the cell cycle for each cell was manually determined; pre-start cells (G1) responded to pheromone directly while post-start cells (S) budded and finished a round of replication before responding to pheromone (Fig S4A). Analogously image montage for YFP channel (as the one showed in Fig. S4B) were created with Rcell. To avoid missing out-of-focus polarizations, a Z stack was acquired at each time. Polarization time was determined as the first time in which a sustained polarization was observed, for example 16.5 minutes in Fig. S4B. To avoid any bias, the cell-cycle and polarization-time determinations were done independently, and the order in which the cells were presented was randomized.

Three independent repetitions of each strains were done, finding very good repeatability. To estimate the uncertainty in the cumulative polarization curves (Fig. S4C), repetitions were pooled and 95% confidence intervals were calculated from 1000 bootstrap samples (11).

**7. Triple monomeric NeonGreen DNA sequence.**

ATGGTCTCAAAGGGGAGGAGGACAACATGGCATCCTTGCCAGCAACTCACGAATTACATATTTTCGGAAGTATTAATGGTGT  
 TGACTTTGATATGGTTGGACAAGGCACTGGTAATCCAAACGATGGATACGAGGAACCTAATCTTAAATCAACAAAAGGCGATT  
 TGCAATTTCCCCCTGGATTCTGTGCCCATATTGGGTACGGCTTTCATCAATATTTACCTTACCCTGATGGAATGAGTCCATT  
 CAAGCCGCTATGGTAGACGGTTCTGGCTACCAAGTTCATAGAACCATGCAGTTTGAAGACGGCGCTTCTTAACAGTAAACTA  
 CAGGTACACGTACGAGGGTCCCATATTAAGGGAGAAGCCCAAGTTAAGGGTACTGGTTTTCCGGCTGATGGTCCCGTTATGA  
 CTAATAGCCTGACAGCTGCTGACTGGTGTAGGTCTAAAAAGACATATCCTAACGATAAAACAATAATTTCAACTTTTAAGTGGT  
 CTTATACCACTGGCAATGGTAAAAGATACAGATCCACTGCCGTAACGTATACATTTCGCTAAACCAATGGCCGCTAATTATC  
 TTAATAATCAACCCATGTACGTGTTTAGGAAGACTGAACTAAAACATAGTAAGACCGAGTTGAACTTTAAGGAATGGCAAAA  
 GCCTTACCCGATGTCATGGGAATGGATGAATTATATAAGATGGTTTCCAAGGGTGAGGAAGATAATATGGCATCTTGGCCAGC  
 CACACACGAATTGCACATATTTGGTTCTATTAATGGAGTGGACTTCGATATGGTGGGCAAGGTAAGTACTGGCAACCCTAATGACG  
 GATATGAAGAAGTAACTGAAGTCTACCAAGGCGATTACAGTTTTCTCTGGATCTTAGTTCCTCATATCGGCTATGGTTT  
 CCATCAATACTTGCCTTACCCGGATGGTATGAGCCGTTTCAAGCTGCGATGGTAGATGGTTCAGGTTATCAAGTCCATAGAAC  
 CATGCAATTTGAAGACGGTGCCTTTAACTGTAAATTACAGATACACTTATGAAGTTTACACATTAAGGAGAAAGCTCAAGT  
 TAAAGGTACAGGCTTCCAGCAGATGGTCTGTATGACCAATTCTTAACAGCTGCTGATTGGTGTAGATCAAAAAAGACTTA  
 CCCAAACGATAAAACAATTATATCTACCTTTAAATGGTCTACACTACTGGCAATGGTAAAAGATACAGGAGCACTGCTCGTAC  
 TACTTACACGTTTCGCTAAACCGATGGCTGCAAATTACTTGAAAAATCAACCAATGTATGTATTTAGAAAACTGAATTGAAGCA  
 TTCTAAAACAGAGCTTAACTTTAAGAATGGCAAAAAGCATTACAGACGTTATGGGCATGGACGAATTGTATAAAATGGTCT  
 CTAAGGGTGAAGAAGATAATATGGCGTCTCTACCAGCTACACACGAAGTGCATATCTTCGGTAGCATCAACGGTGTAGACTTC  
 GATATGGTCGGACAAGGCACCGGAAACCCAAATGATGGGTATGAAGAATTGAACCTAAAGTCAACGAAGGGTACTTACAGT  
 TTAGCCCTTGGATTCTAGTGCCACACATTGGTTATGGTTTTTCATCAATACCTACCTTACCCCGACGGAATGTACCATTTCAAGC  
 CGCTATGGTTGATGGTCCGGTTATCAAGTTCACAGAAGTATGCAGTTTGAAGATGGAGCTTCCCTGACTGTCAACTACAGGTA  
 CACTTACGAAGTTTCTCATATCAAGGGTGAAGCACAAGTTAAAGGAACCGTTTTCTGCCGATGGACCGTTATGACTAACTC  
 TTTGACGGCTGCCGATTGGTGCAGGAGTAAAAAGACCTACCCAAACGATAAAACTATCATCAGCACTTTAAGTGGTCATATAC  
 TACCGGGAACGAAAGAGATATAGATCAACCGCTAGAACGACATACACATTTGCCAAGCCTATGGCAGCTAACTACTTAAAA  
 ATCAACCTATGTACGTGTTTCGTAACCGAATTGAAGCATAGCAAGACAGAATTAATTTCAAGGAATGGCAAAAAGCCTTC  
 ACCGATGTTATGGGTATGGACGAACCTTATAAATAG

**8. Supplemental References**

1. Ma W, Trusina A, El-Samad H, Lim W, & Tang C (2009) Defining network topologies that can achieve biochemical adaptation. *Cell* 138(4):760-773.
2. Koshland DE, Jr., Goldbeter A, & Stock JB (1982) Amplification and adaptation in regulatory and sensory systems. *Science* 217(4556):220-225.
3. Ferrell JE (2001) Regulatory Cascades: Function and Properties. *eLS*, (John Wiley & Sons, Ltd).
4. Hoops S, *et al.* (2006) COPASI--a COmplex PAthway SImulator. *Bioinformatics* 22(24):3067-3074.
5. Segall JE (1993) Polarization of yeast cells in spatial gradients of alpha mating factor. *Proc Natl Acad Sci U S A* 90(18):8332-8336.
6. Colman-Lerner A, *et al.* (2005) Regulated cell-to-cell variation in a cell-fate decision system. *Nature* 437(7059):699-706.
7. Longtine MS, *et al.* (1998) Additional modules for versatile and economical PCR-based gene deletion and modification in *Saccharomyces cerevisiae*. *Yeast* 14(10):953-961.
8. Shaner NC, *et al.* (2013) A bright monomeric green fluorescent protein derived from *Branchiostoma lanceolatum*. *Nature methods* 10(5):407-409.
9. Bush A, Chernomoretz A, Yu R, Gordon A, & Colman-Lerner A (2012) Using Cell-ID 1.4 with R for microscope-based cytometry. *Current protocols in molecular biology / edited by Frederick M. Ausubel ... [et al Chapter 14:Unit 14 18.*
10. Gordon A, *et al.* (2007) Single-cell quantification of molecules and rates using open-source microscope-based cytometry. *Nat Methods* 4(2):175-181.
11. Efron B & Tibshirani R (1994) *An introduction to the bootstrap* (Chapman & Hall, New York) pp xvi, 436 p.
